# Supplementary material
Source: PubMed Central journal article supplement (PMC7962994)

# Source Data Fig. 3

**Fig. 3b**

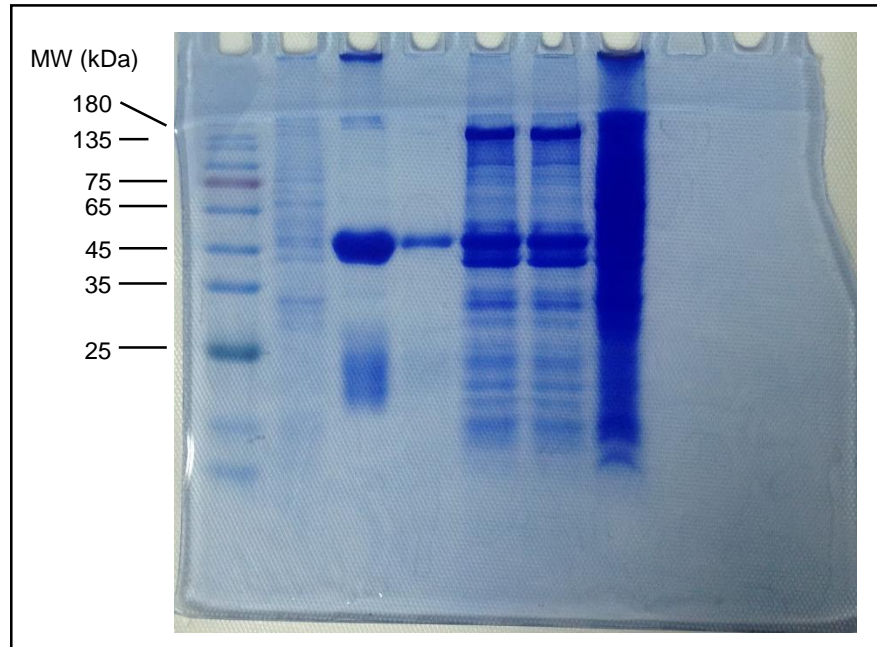

**Fig. 3c**

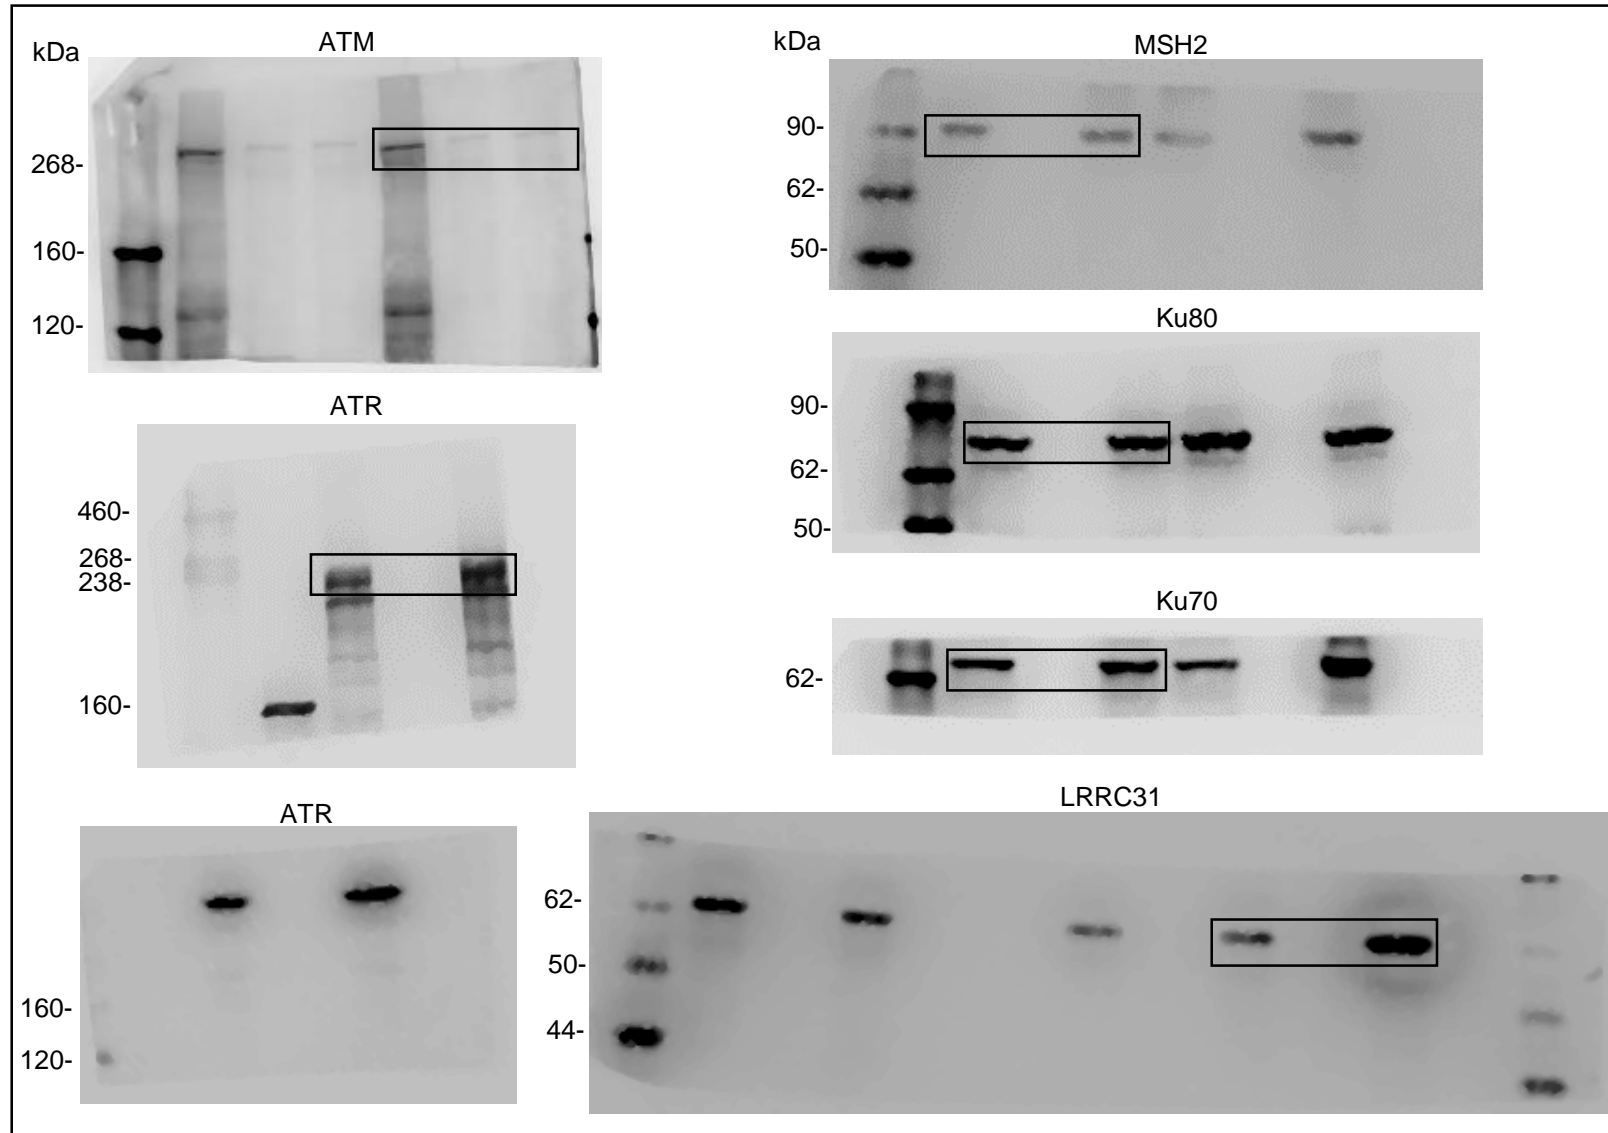

Fig. 3d

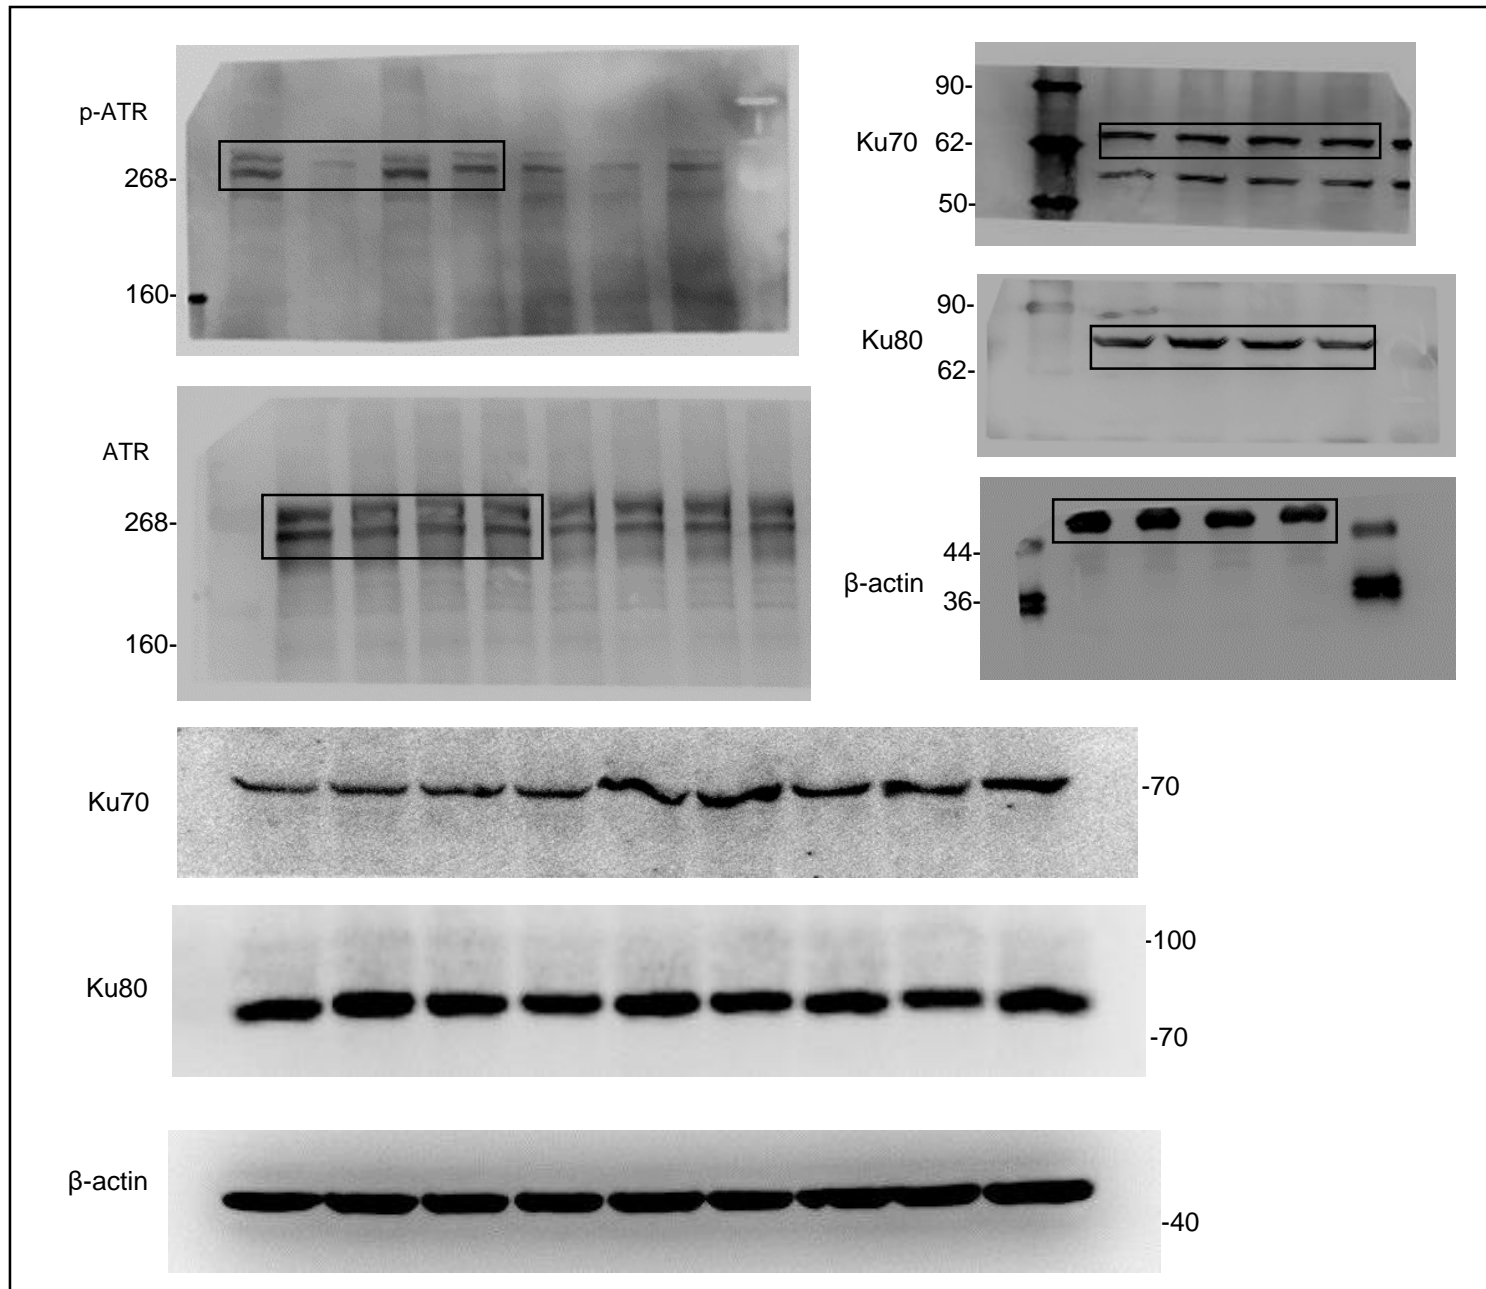

**Fig. 3 k l m**

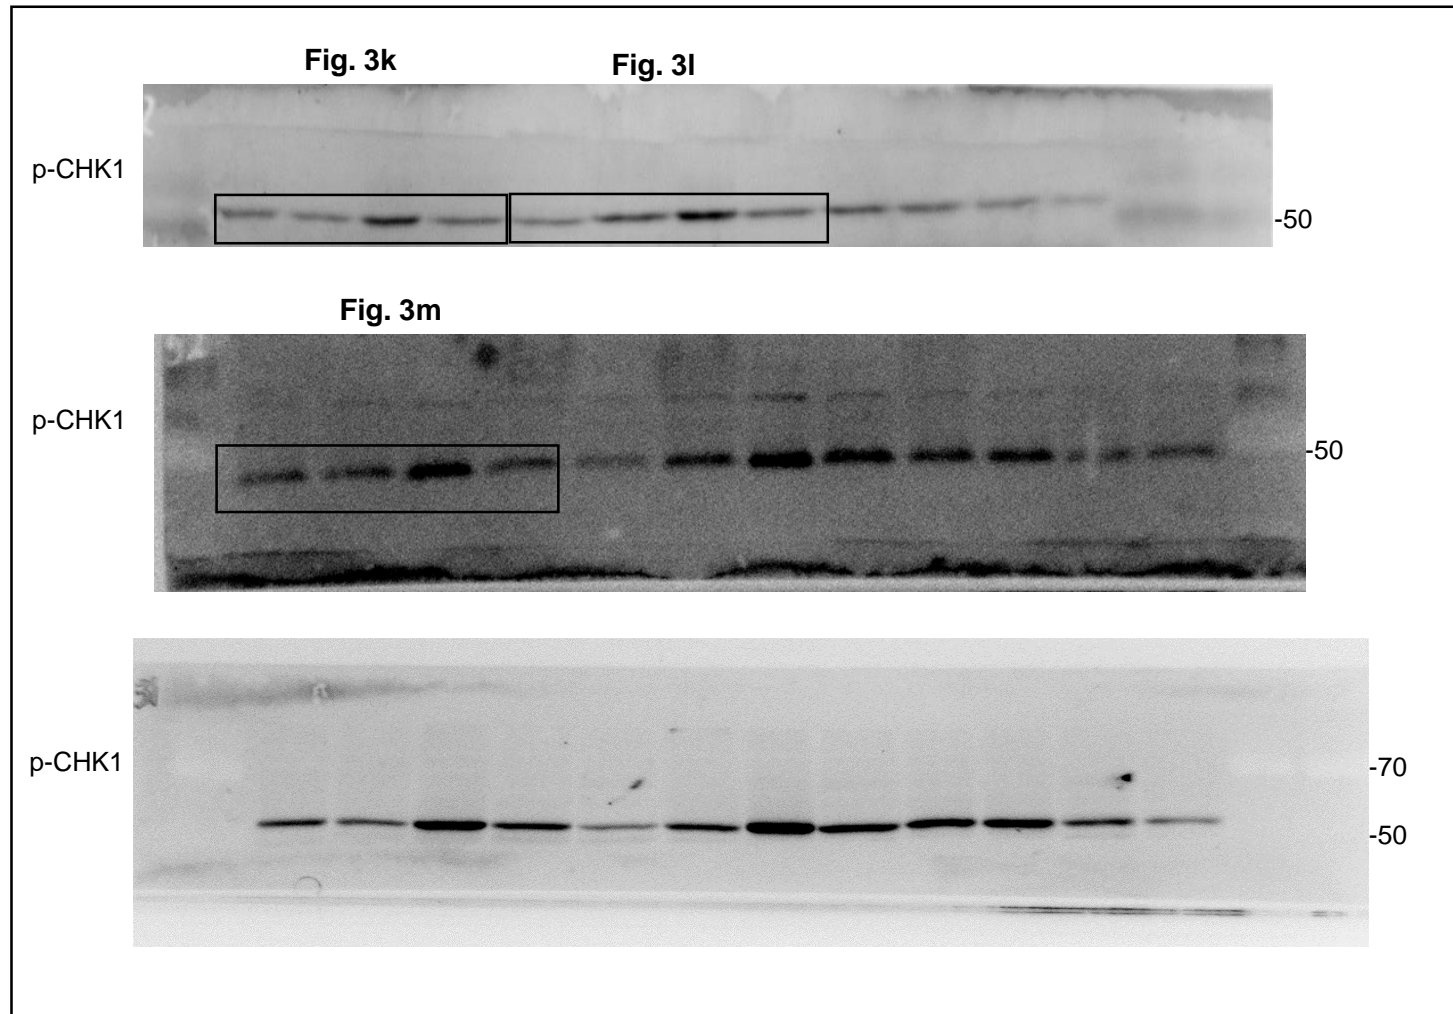

Fig. 3 k l m

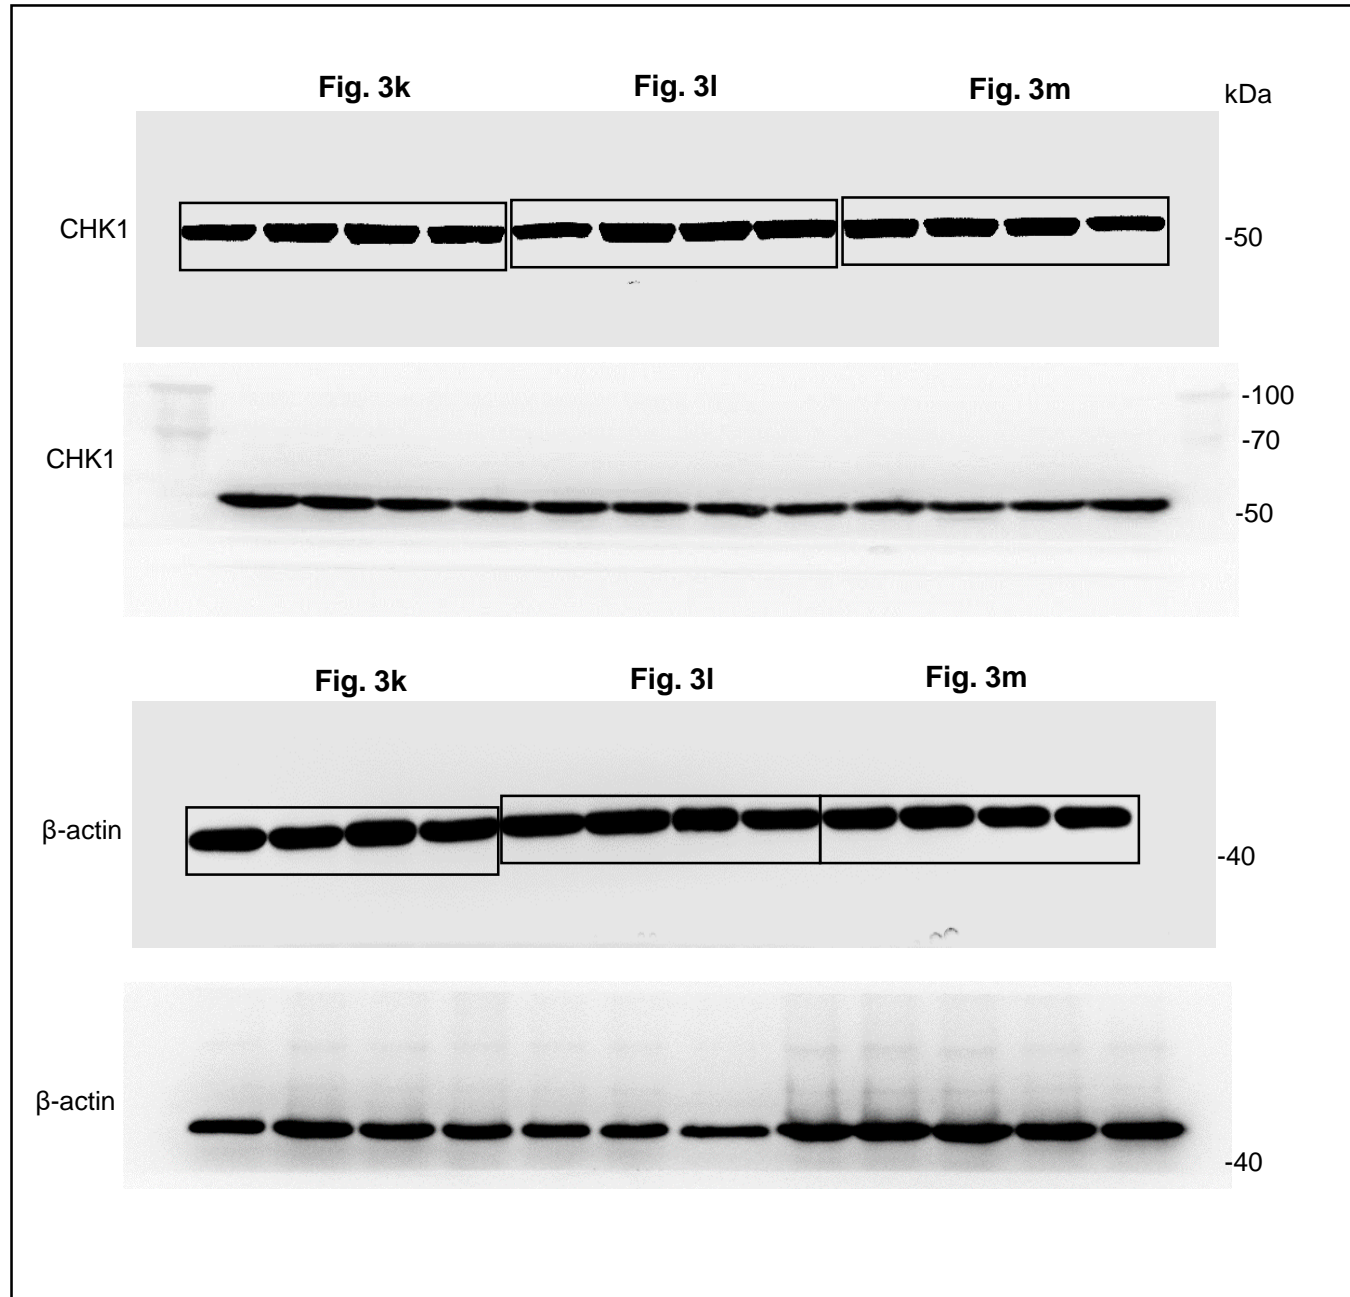

**Fig. 3 k l m**

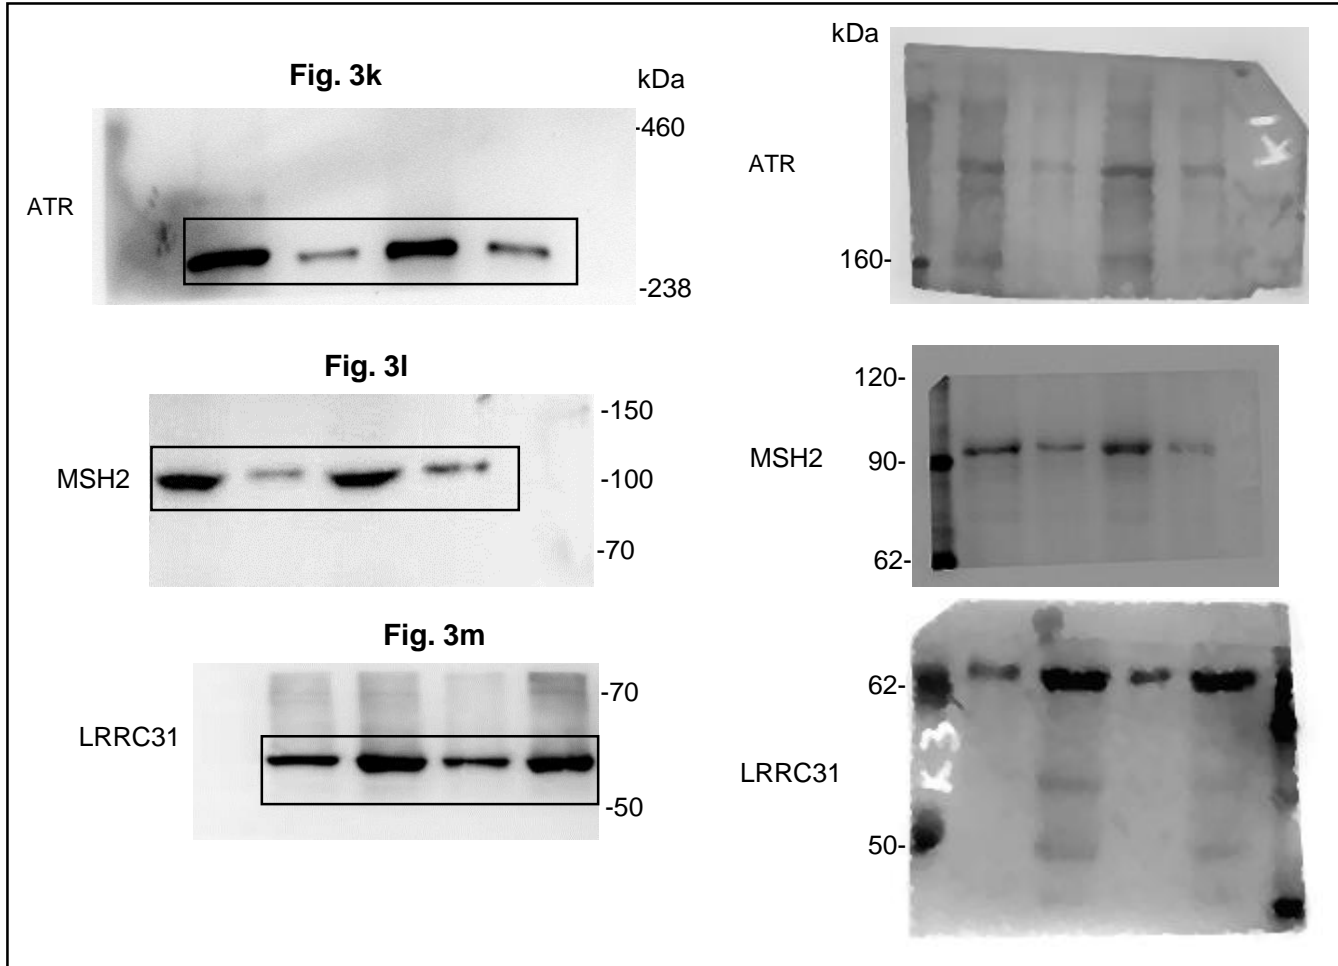

**Fig. 3g**

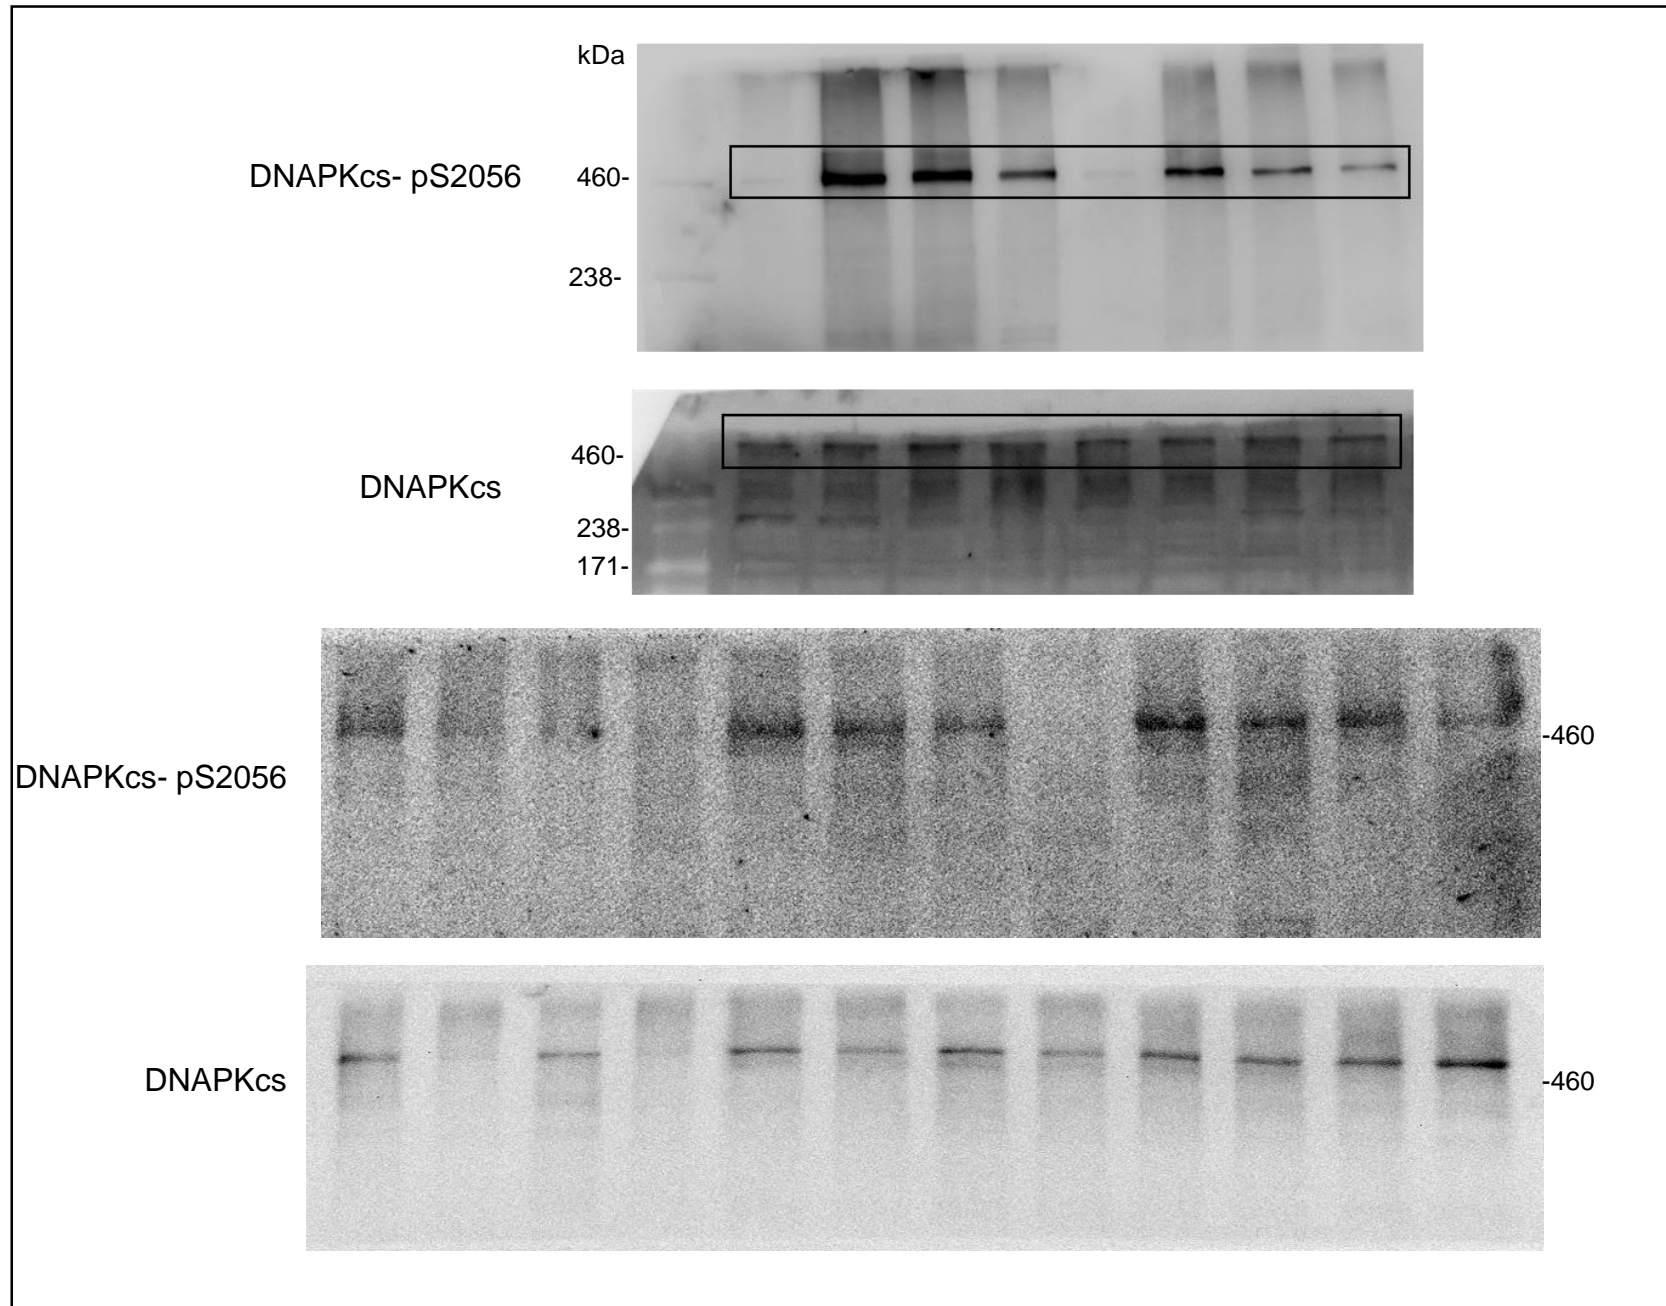

Fig. 3h

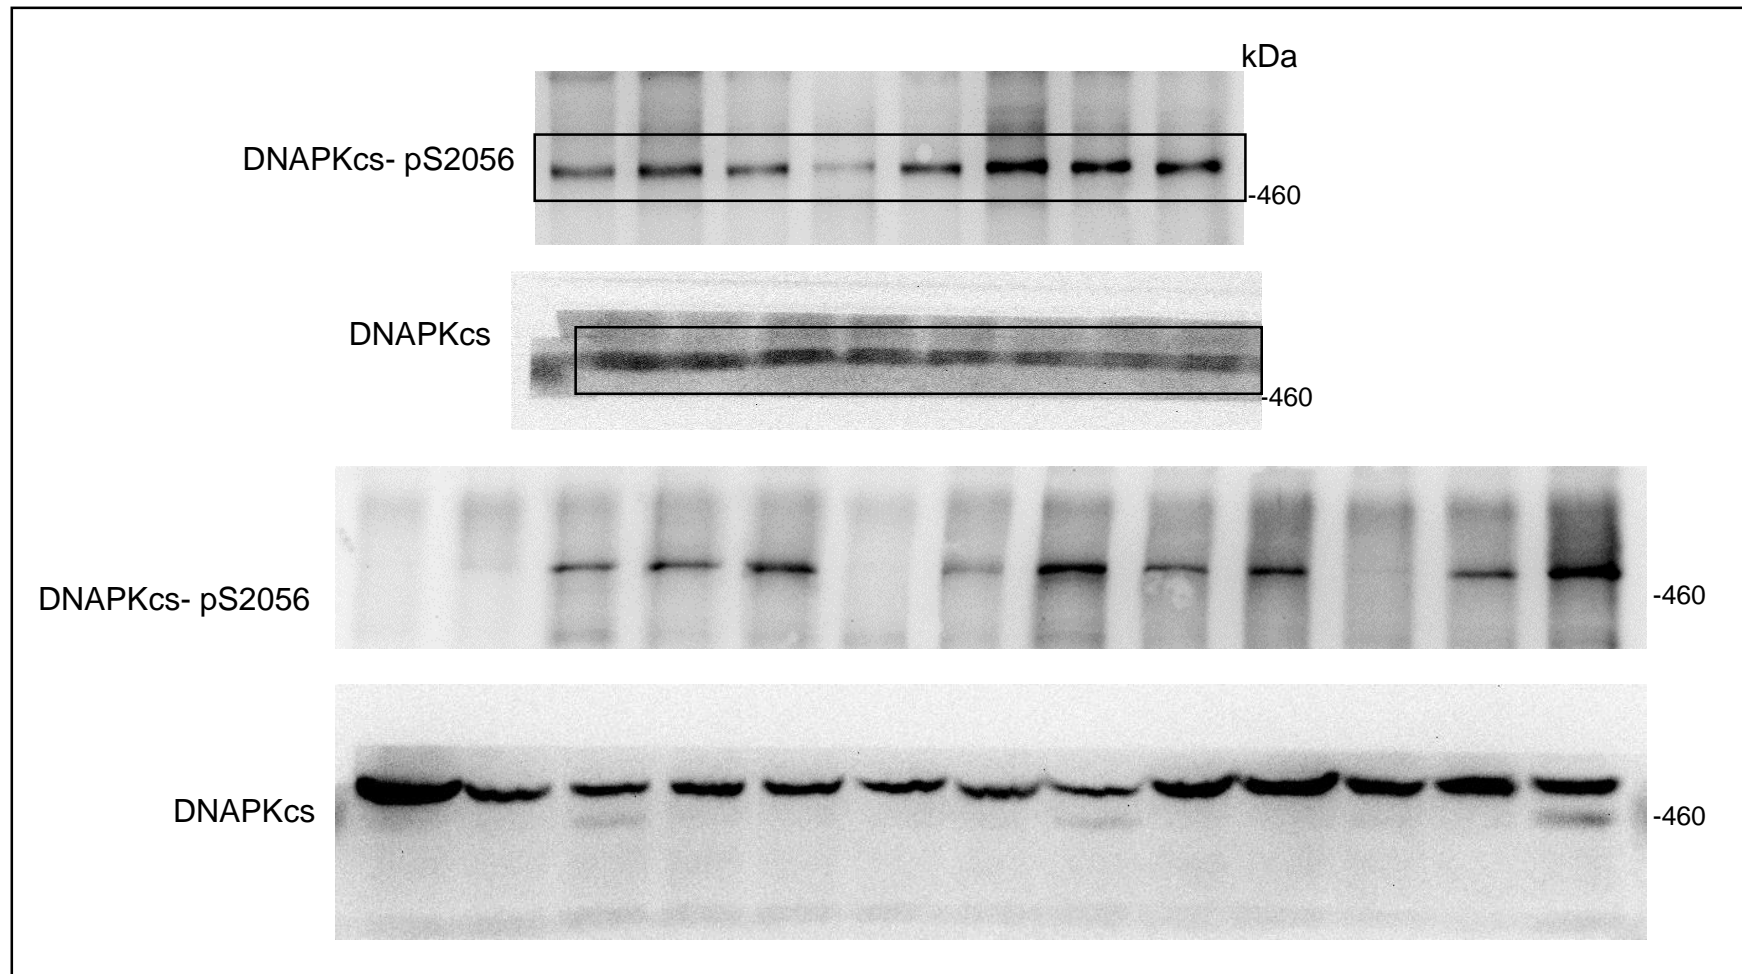



Fig. 3i

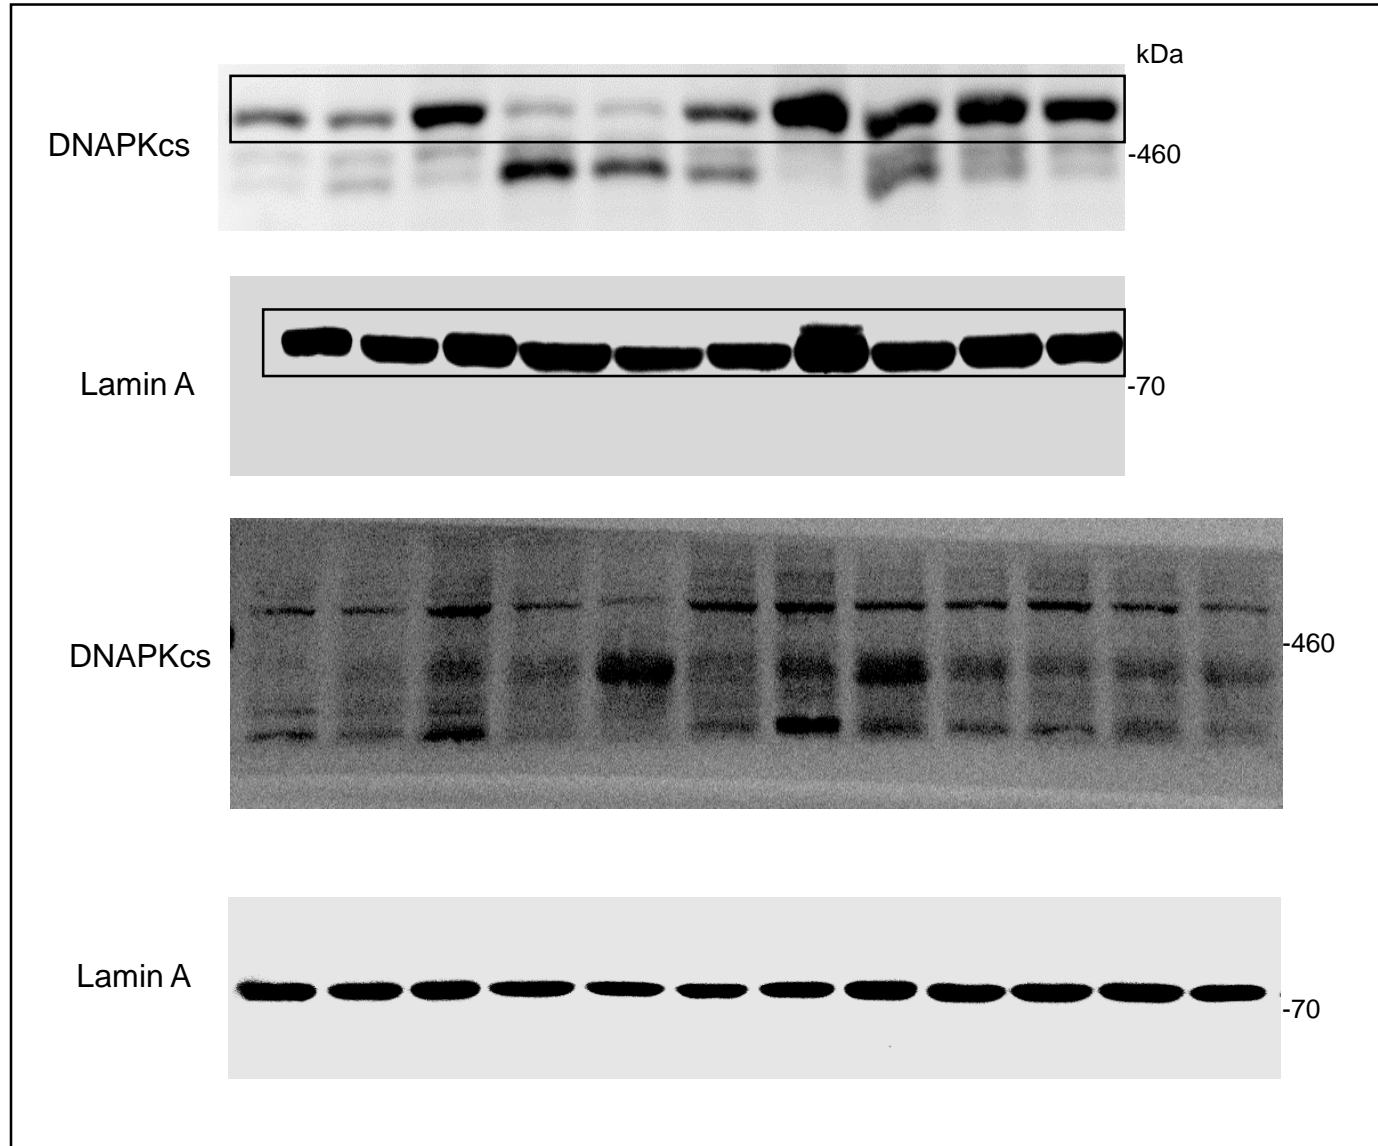

Fig. 3e(WB Ku70)

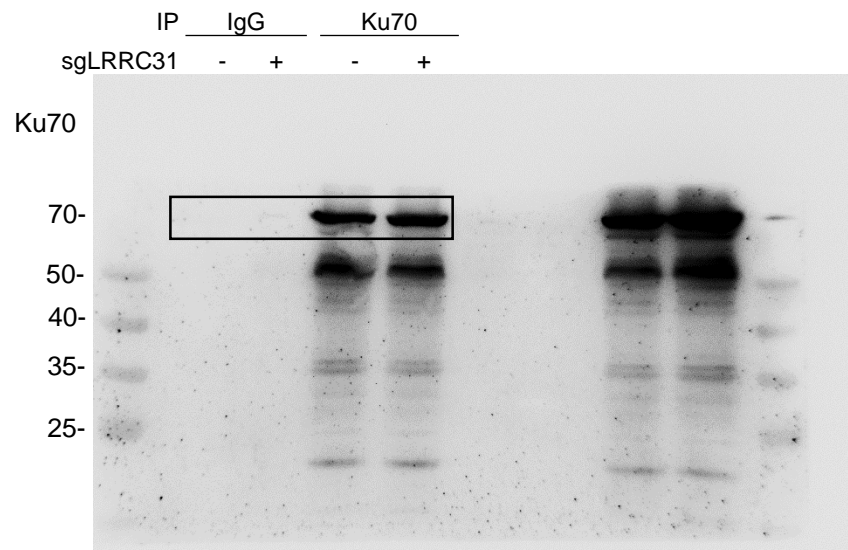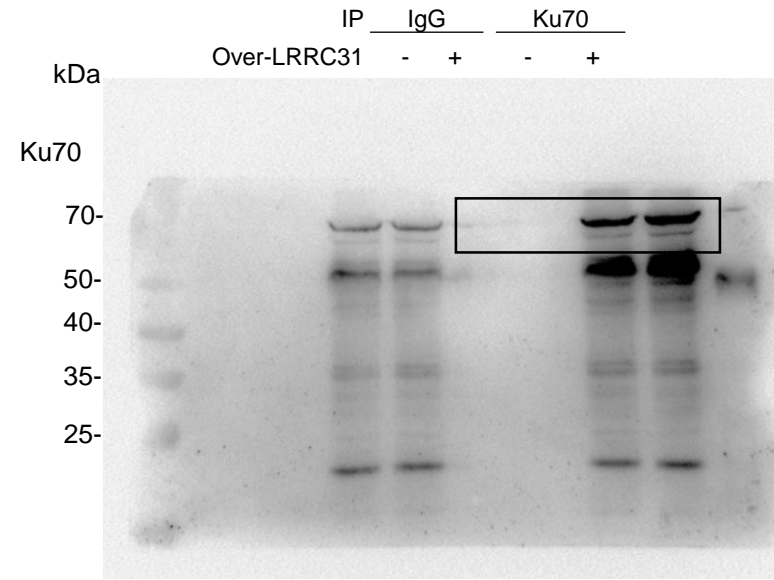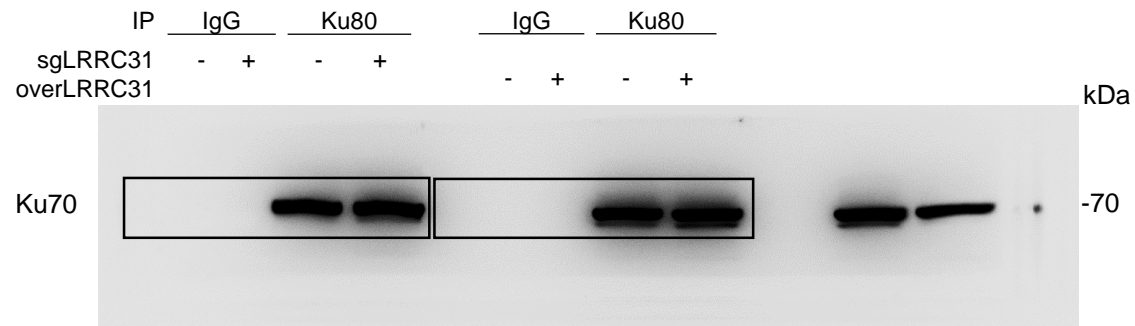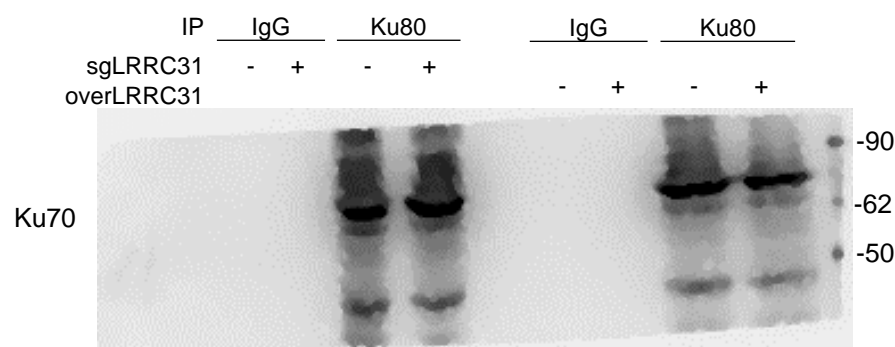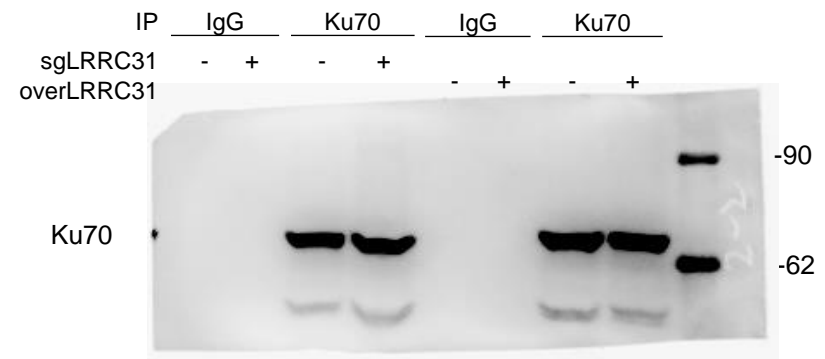

**Fig. 3e (WB Ku80)**

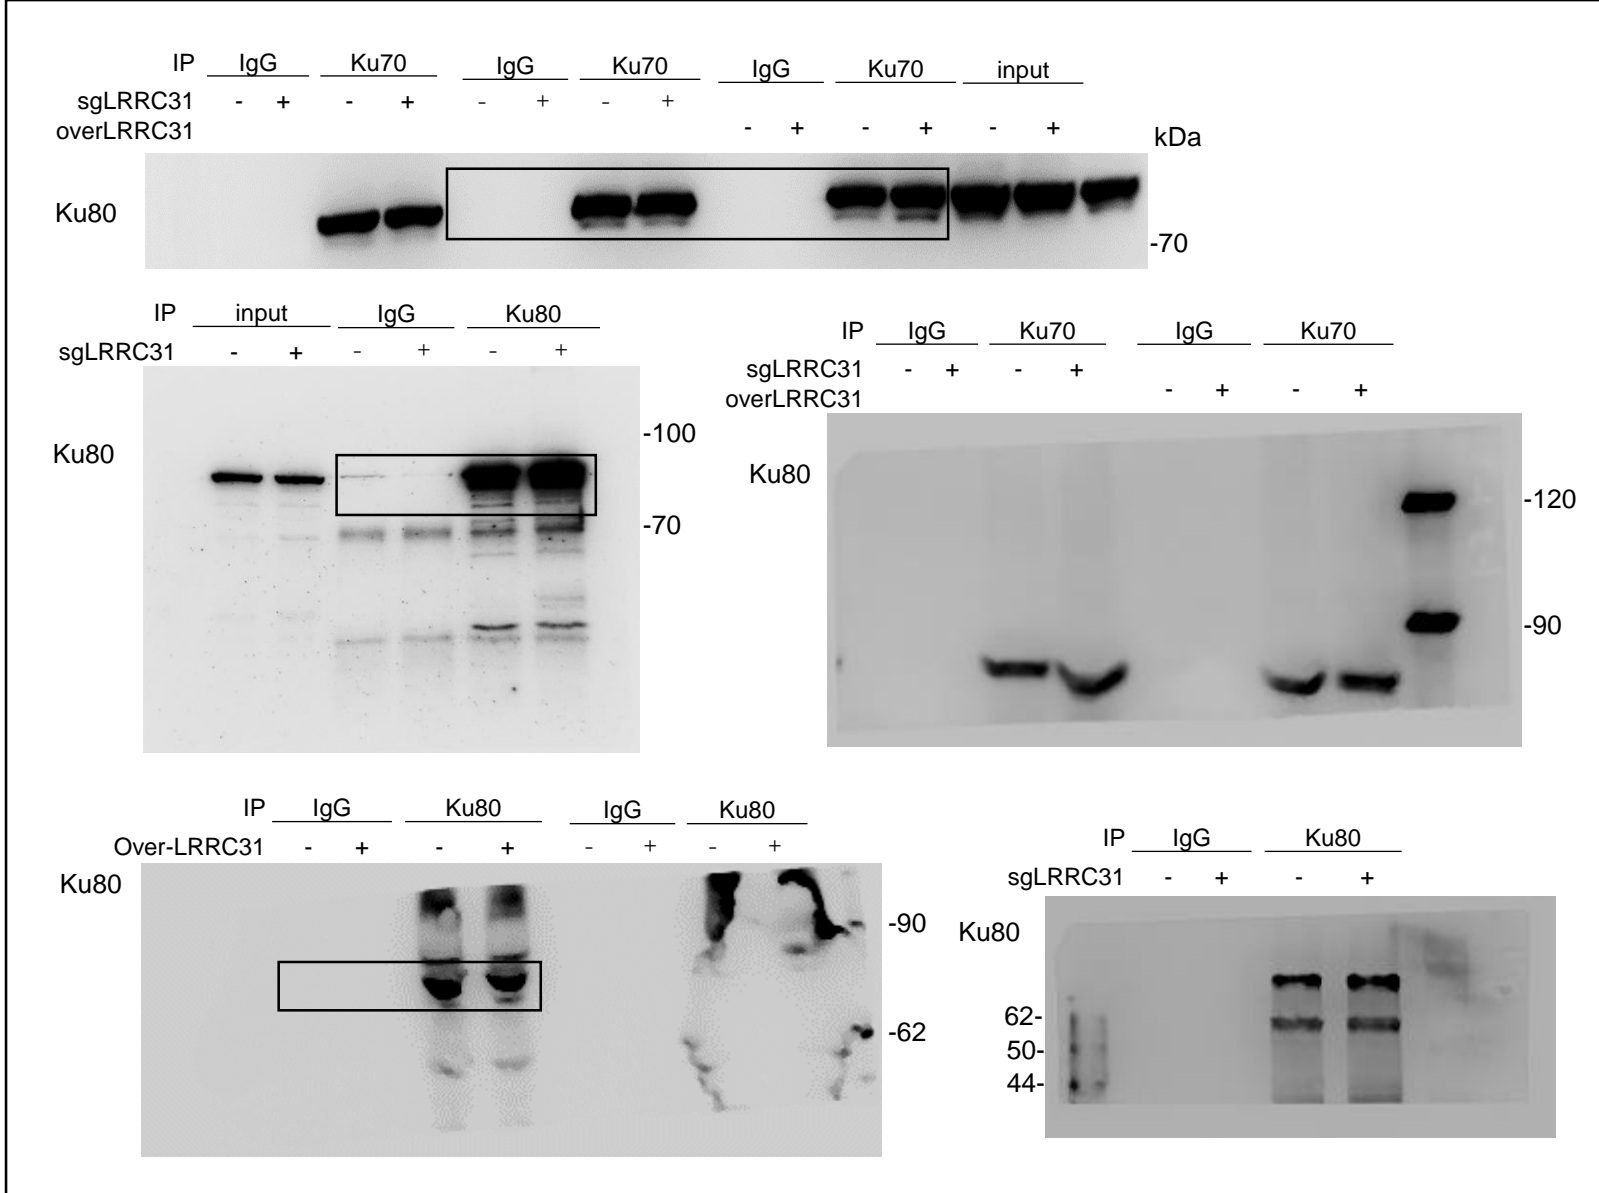

**Fig. 3e(WB DNAPKcs)**

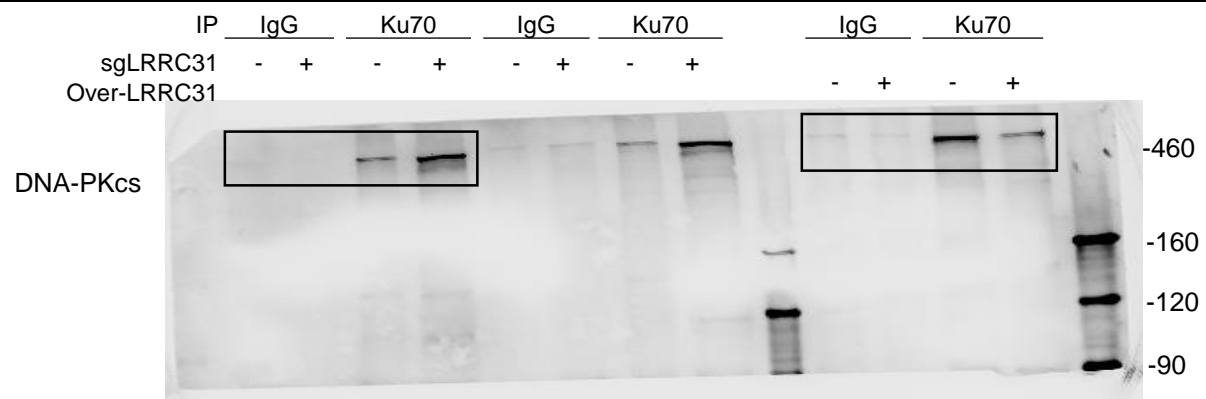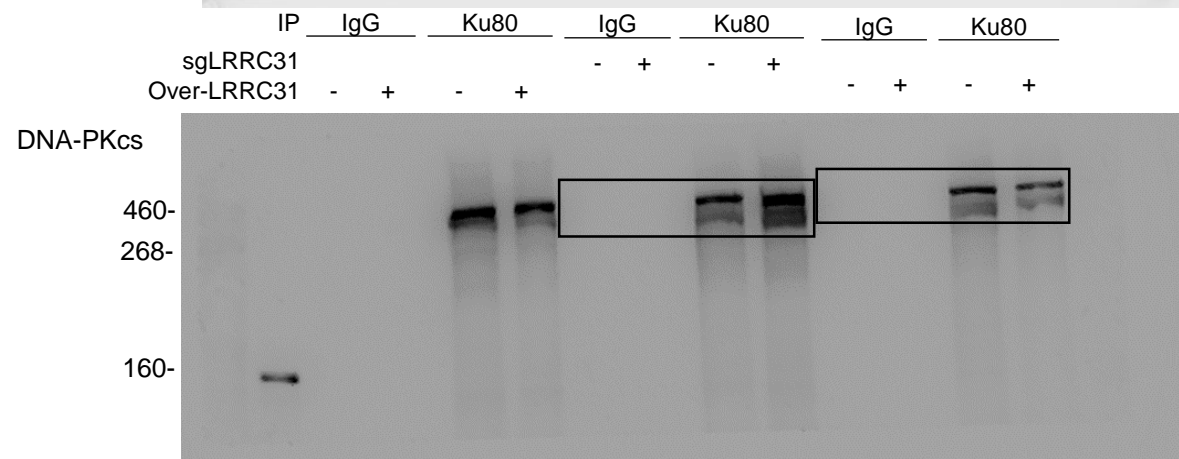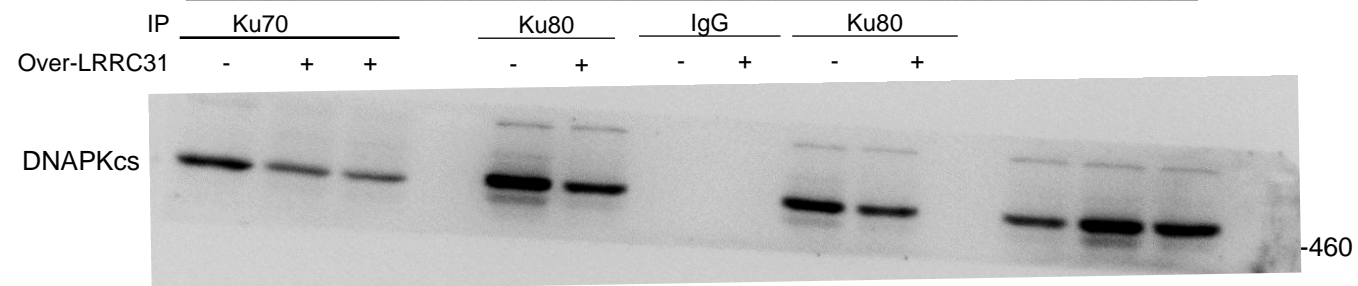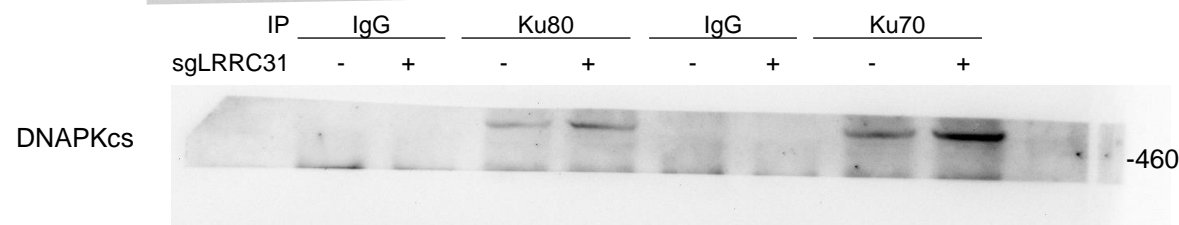

**Fig. 3e (WB LRRC31)**

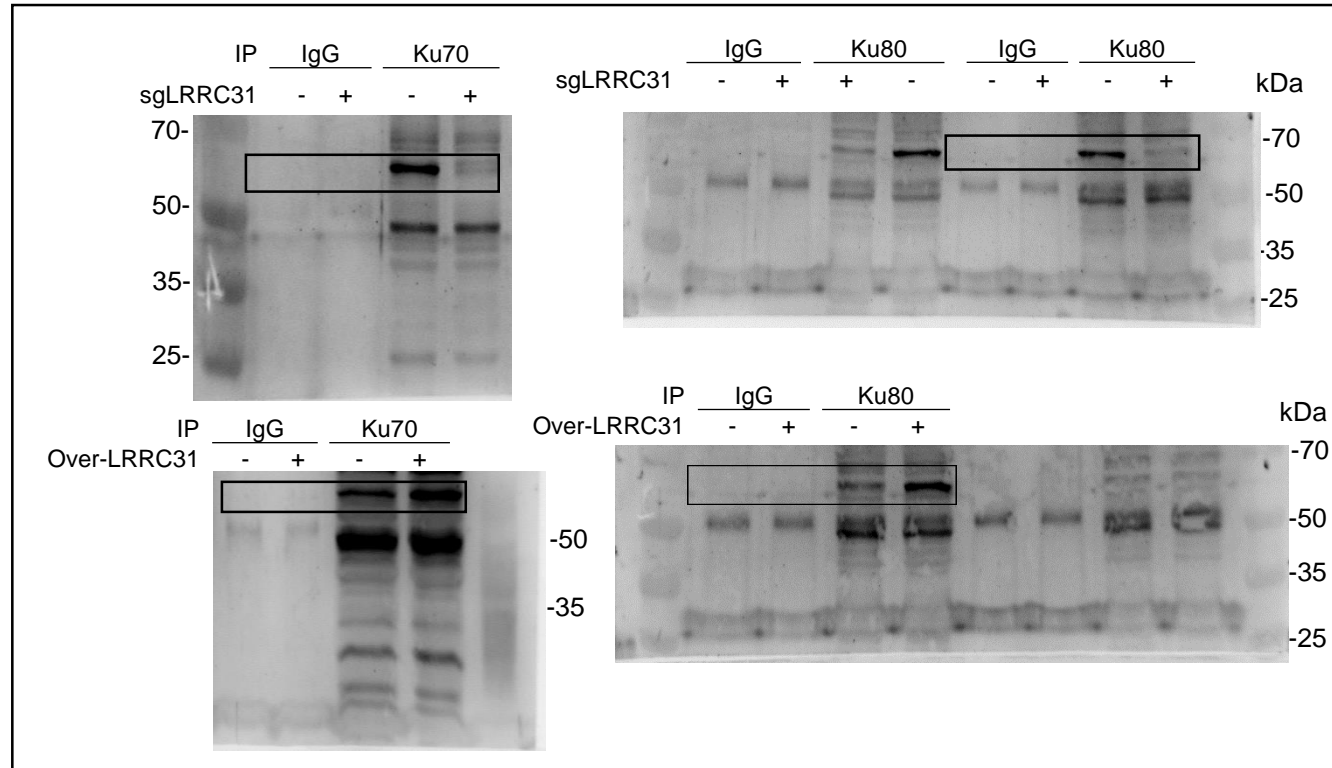

**Fig. 3j (WB MSH2)**

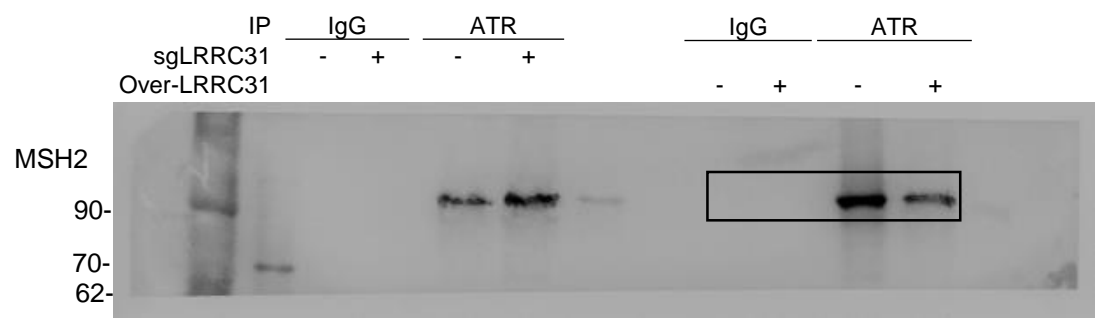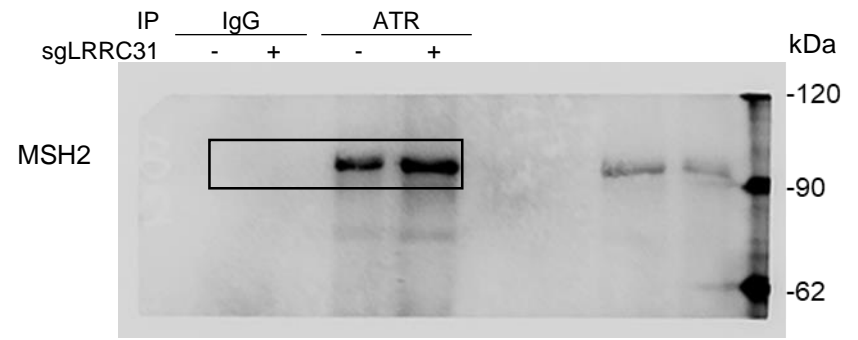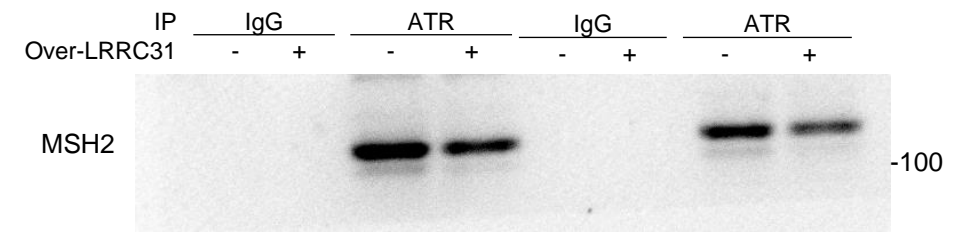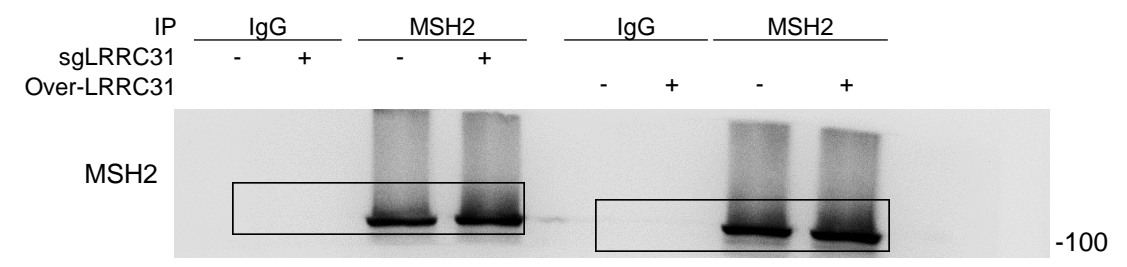

**Fig. 3j (WB ATR)**

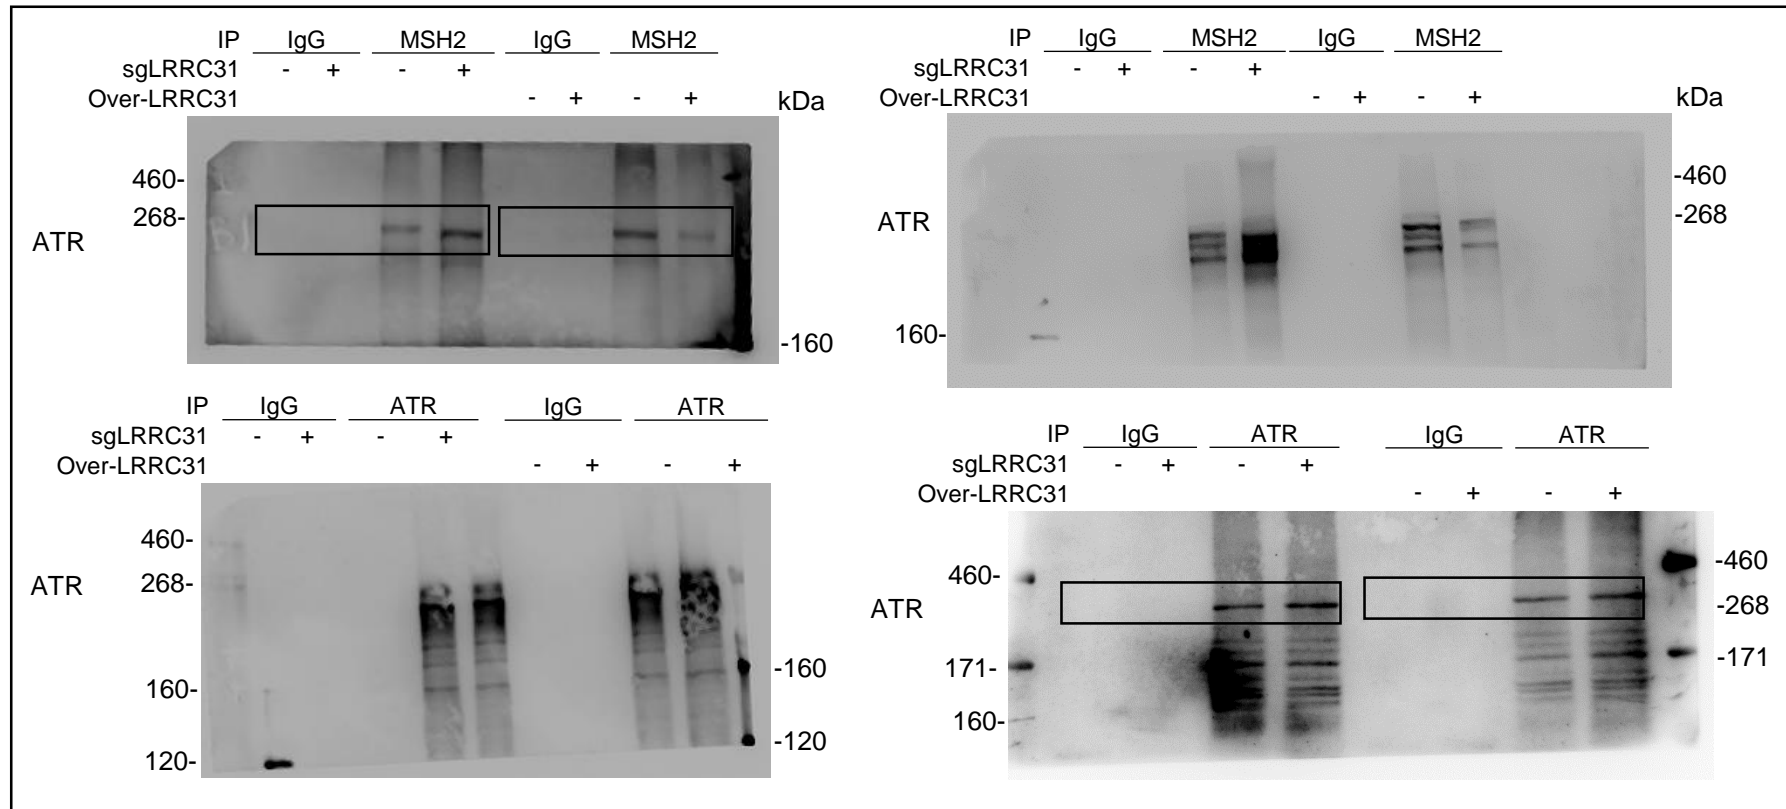

**Fig. 3j ( LRRC31)**

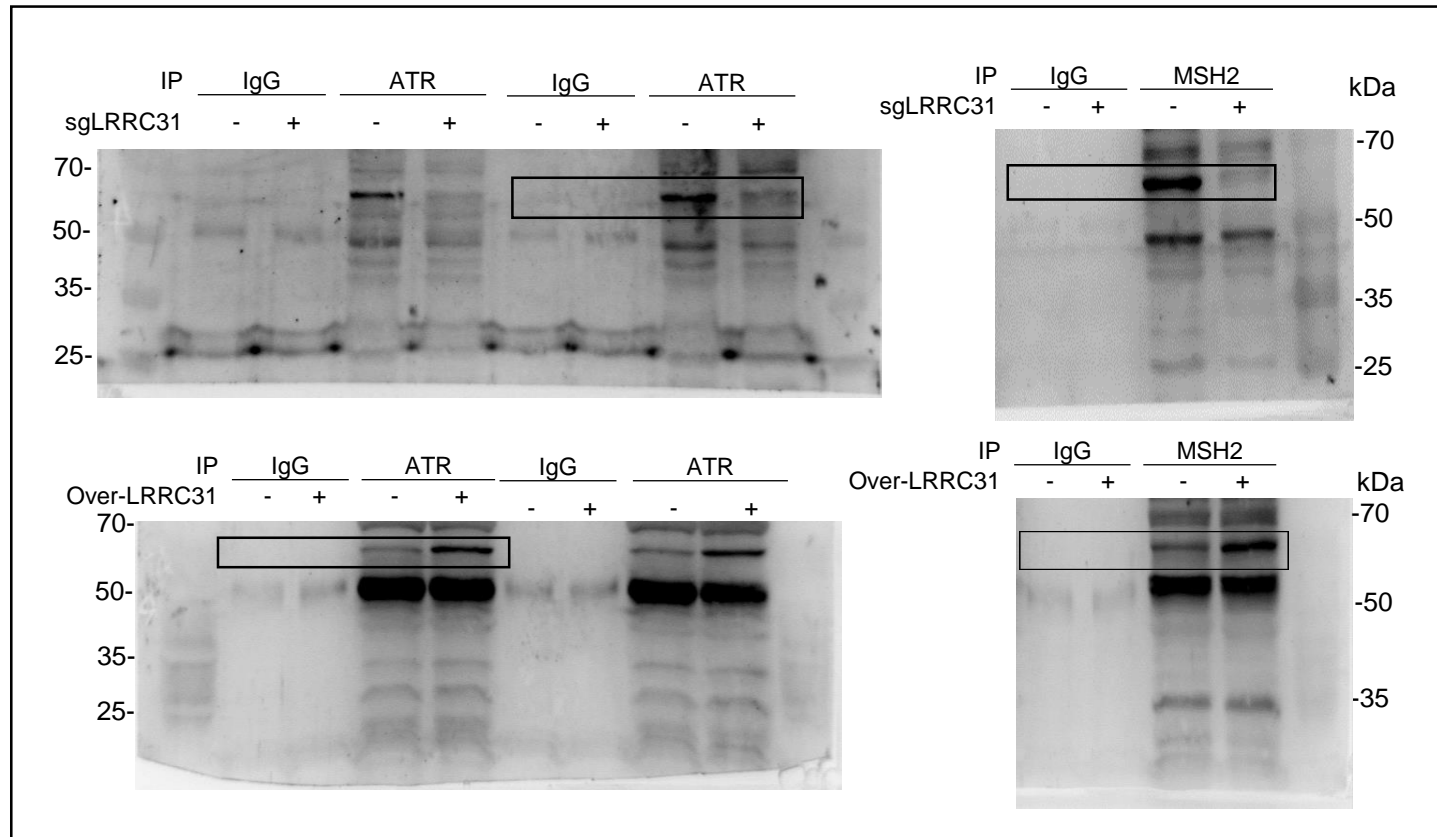

Supplement: NIHMS1624429-supplement-1624429_Blots_SourceData_Fig3.pdf [file NIHMS1624429-supplement-1624429_Blots_SourceData_Fig3.pdf]
