# Supplementary material
Source: PubMed Central journal article supplement (PMC7962994)

# Source Data extended data Fig. 1

## extended data Fig. 1g and 1h

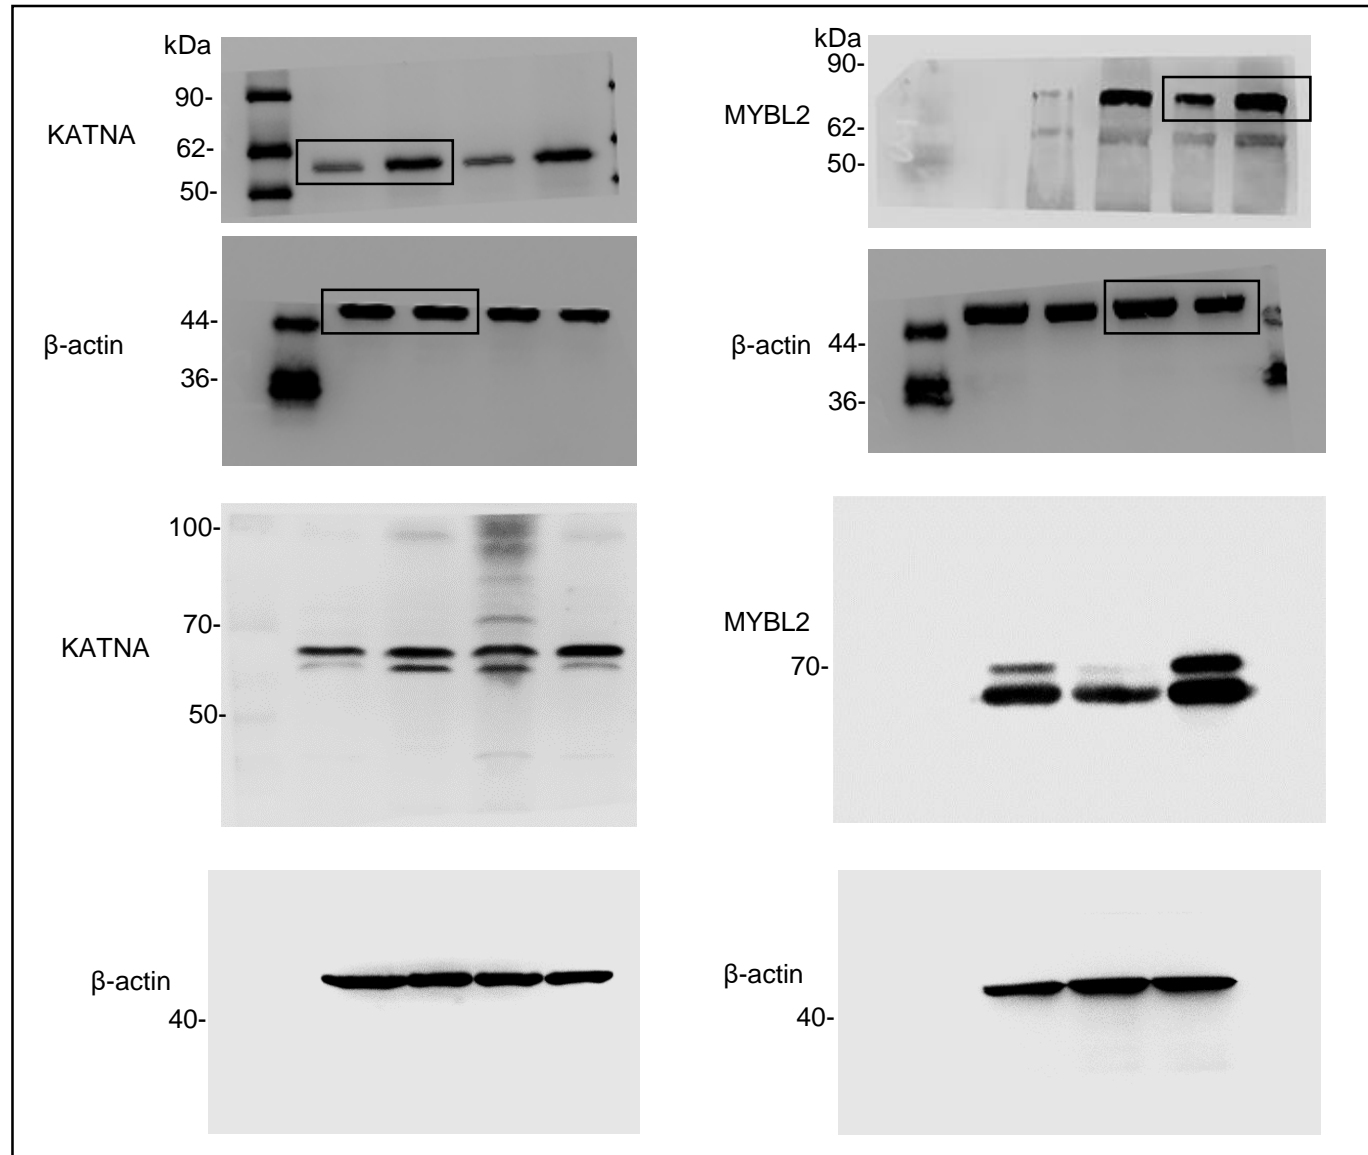

Supplement: NIHMS1624429-supplement-1624429_Blots_ExtData_Fig1.pdf [file NIHMS1624429-supplement-1624429_Blots_ExtData_Fig1.pdf]

Source Data extended data Fig. 2

extended data Fig. 2g

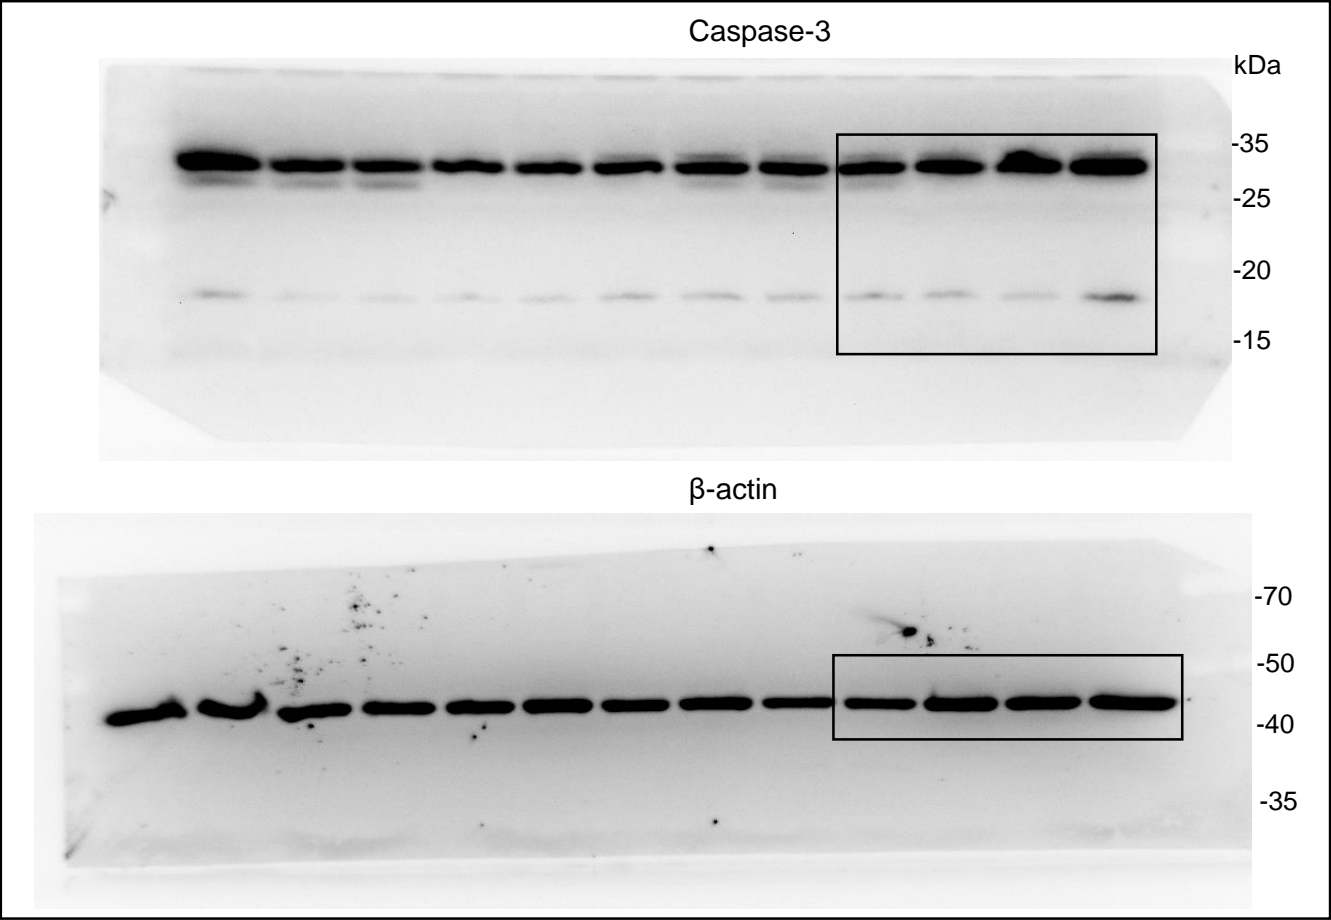

Supplement: NIHMS1624429-supplement-1624429_Blots_ExtData_Fig2.pdf [file NIHMS1624429-supplement-1624429_Blots_ExtData_Fig2.pdf]

Source Data extended data Fig. 5c and 5g

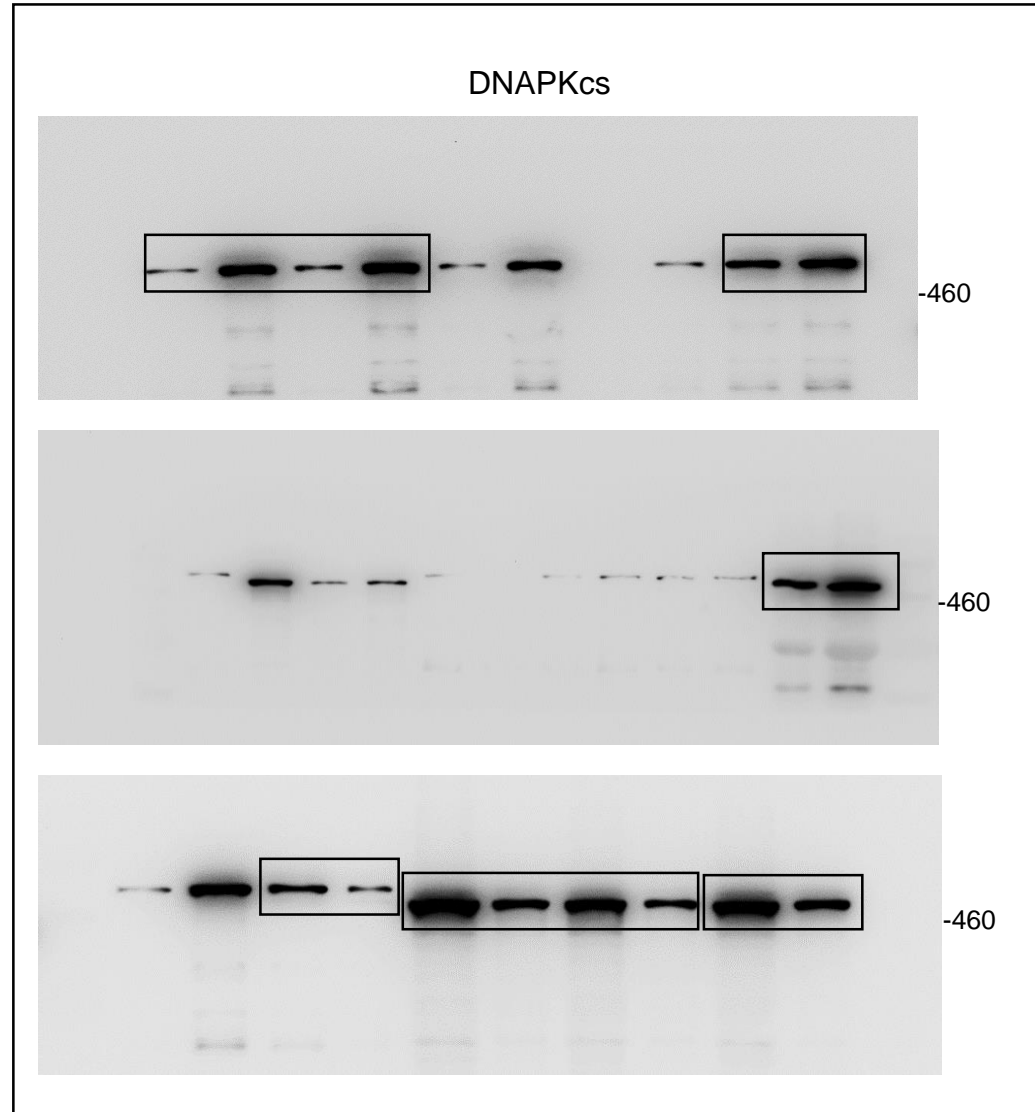

Supplement: NIHMS1624429-supplement-1624429_Blots_ExtData_Fig5.pdf [file NIHMS1624429-supplement-1624429_Blots_ExtData_Fig5.pdf]

# Source Data extended data Fig. 8

extended data Fig. 8a

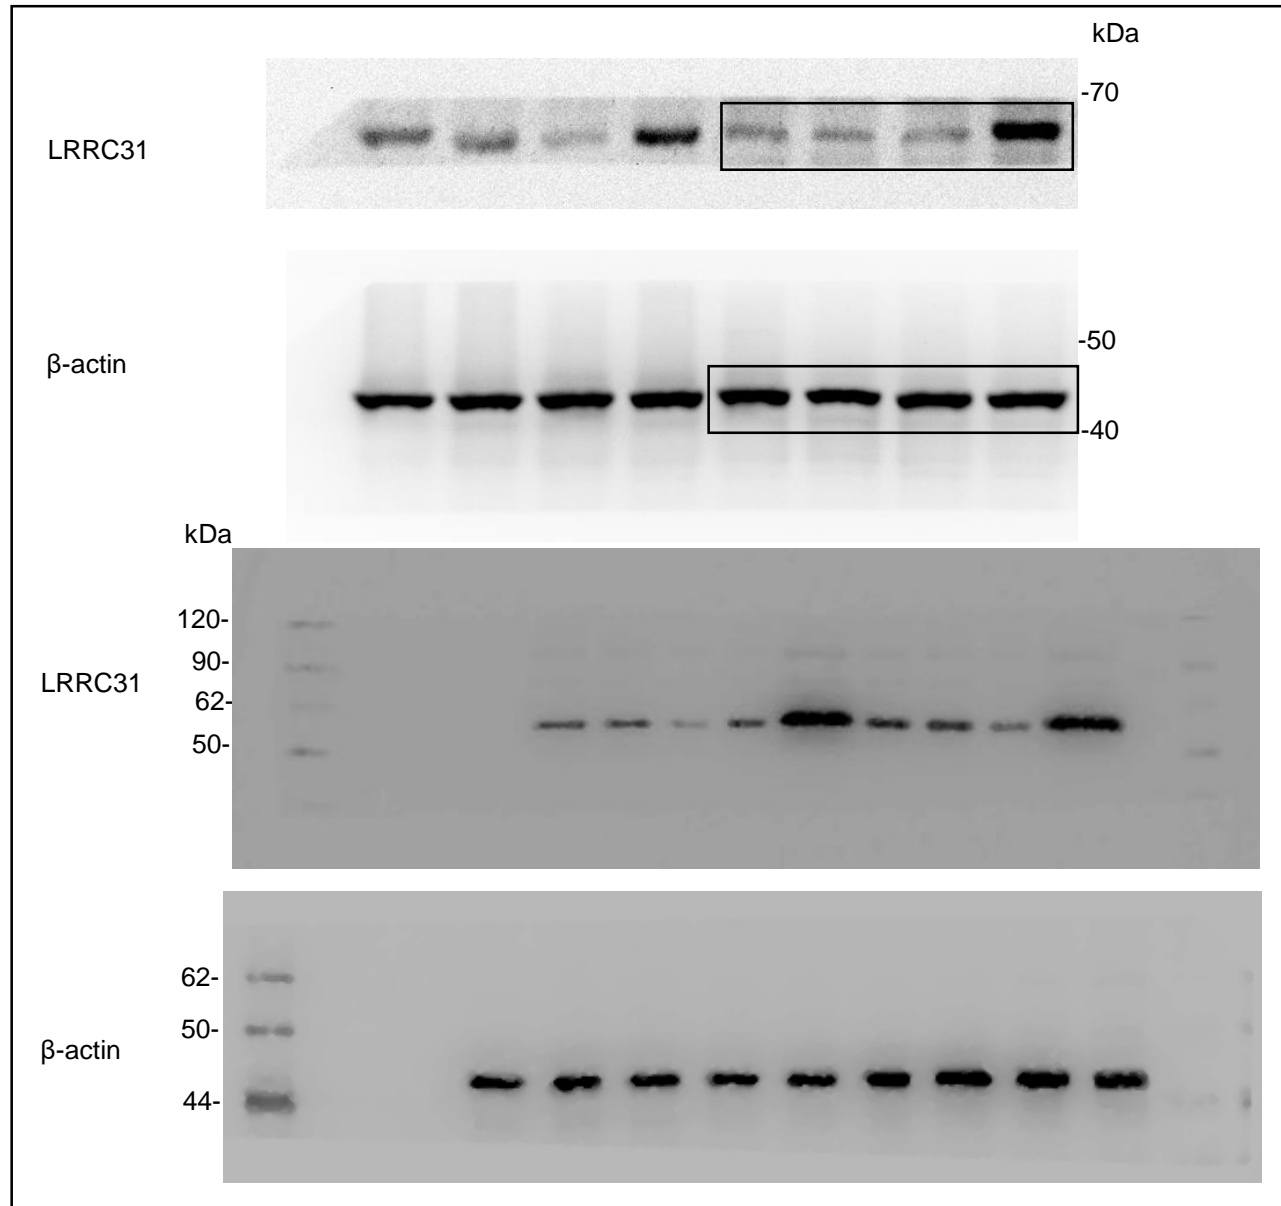

Supplement: NIHMS1624429-supplement-1624429_Blots_ExtData_Fig8.pdf [file NIHMS1624429-supplement-1624429_Blots_ExtData_Fig8.pdf]

# Source Data Fig. 1

Fig. 1b

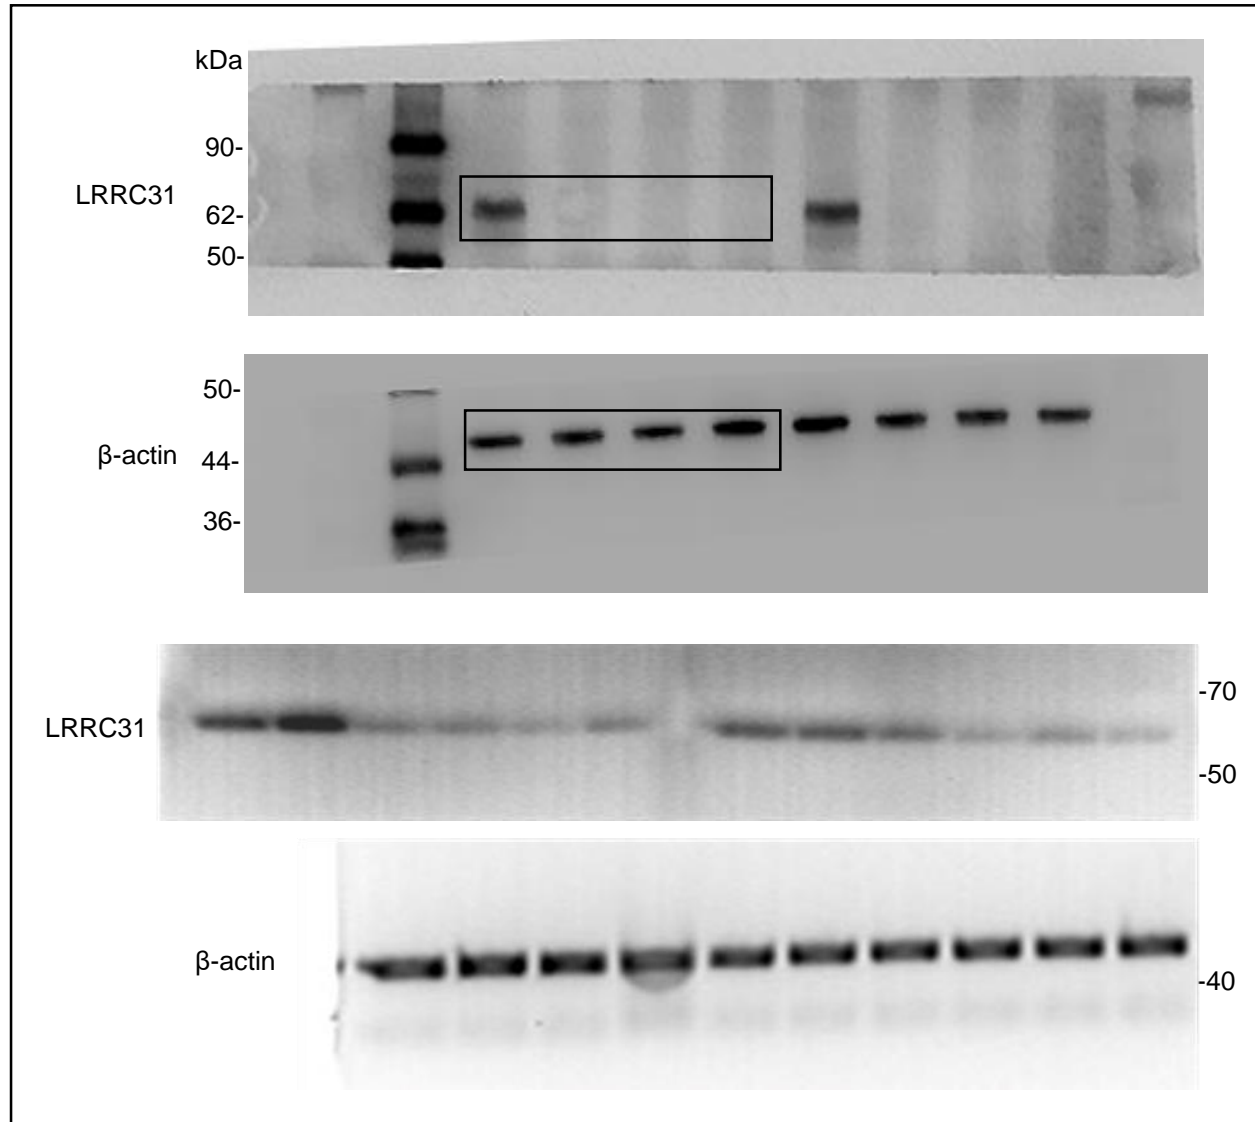

**Fig. 1e**

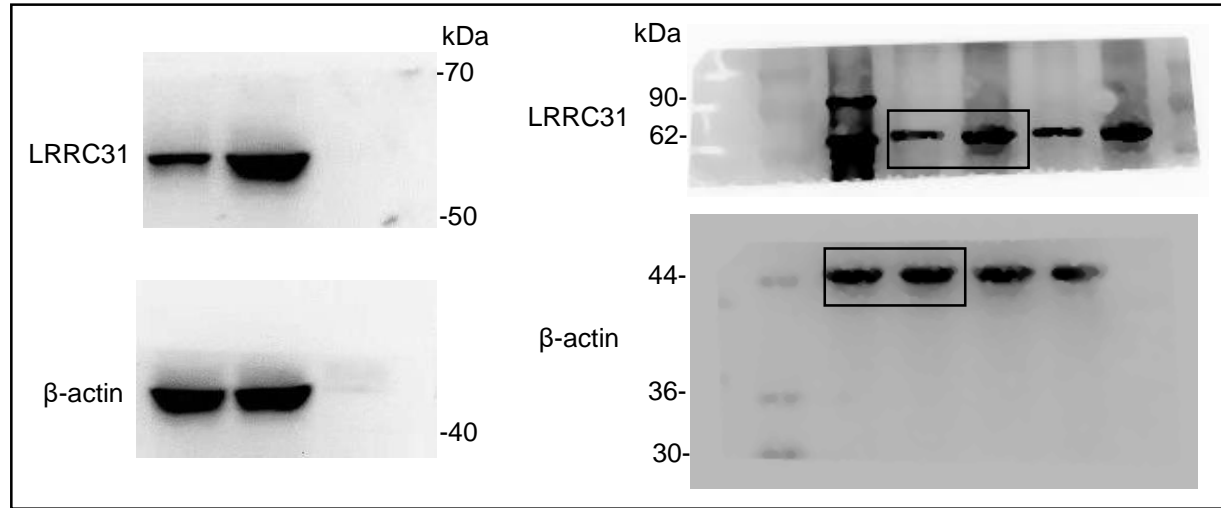

Supplement: NIHMS1624429-supplement-1624429_Blots_SourceData_Fig1.pdf [file NIHMS1624429-supplement-1624429_Blots_SourceData_Fig1.pdf]

# Source Data Fig. 4

## Fig. 4b

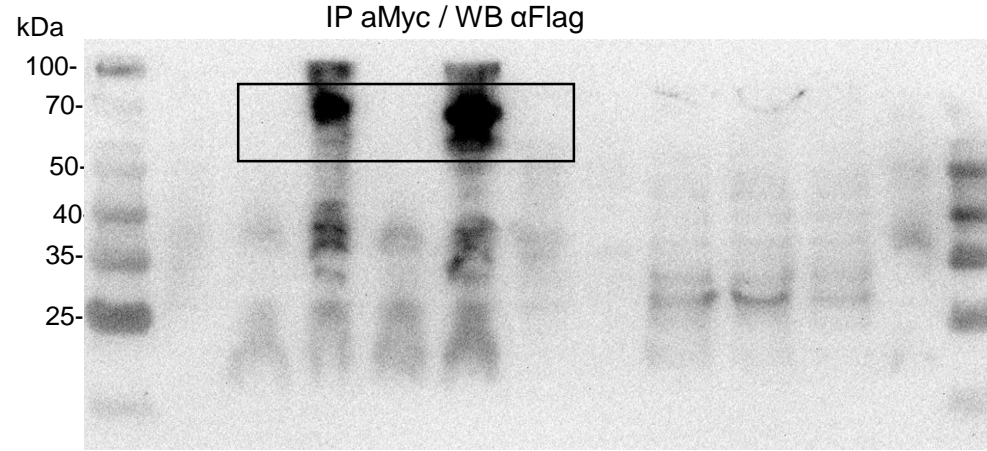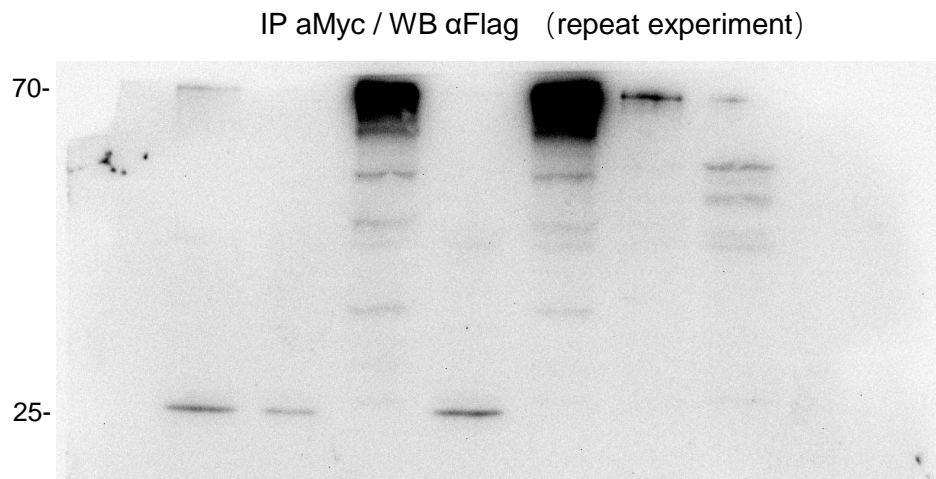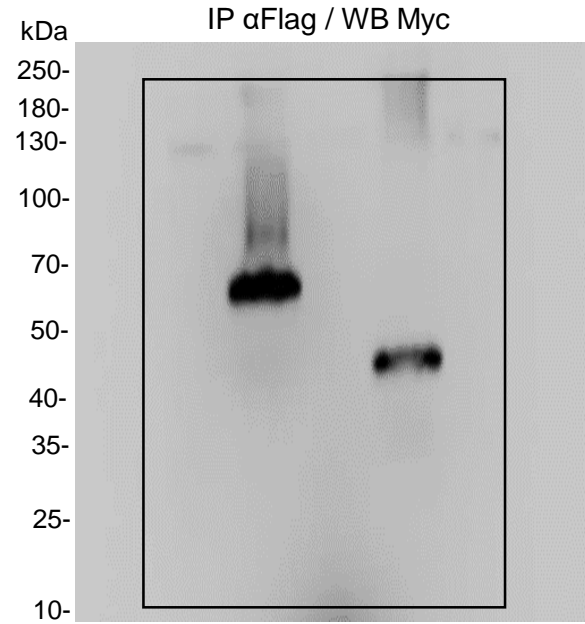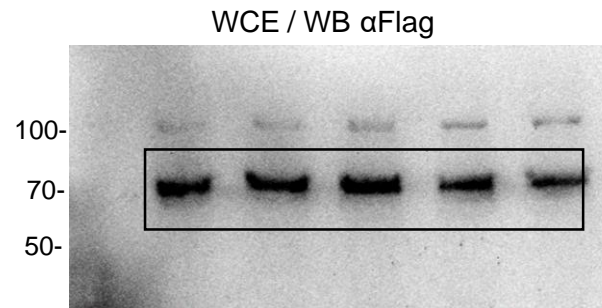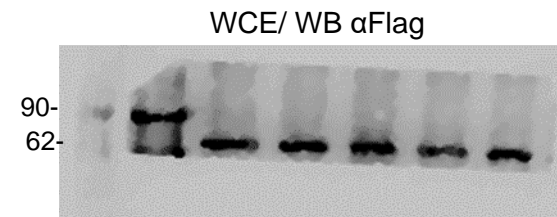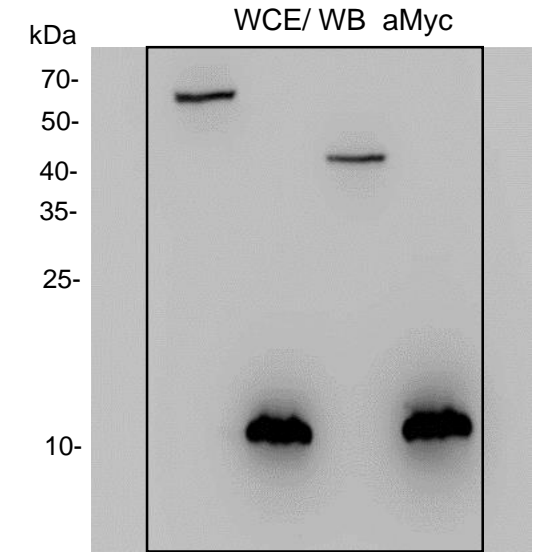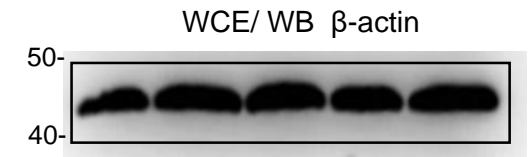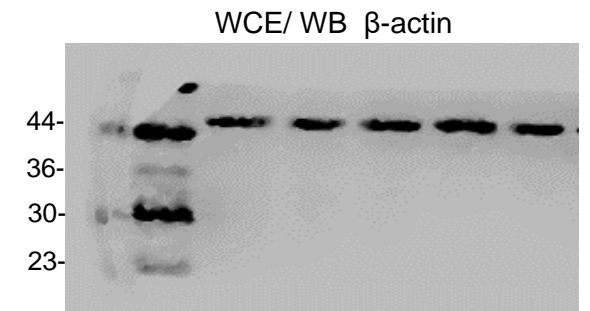

**Fig. 4c**

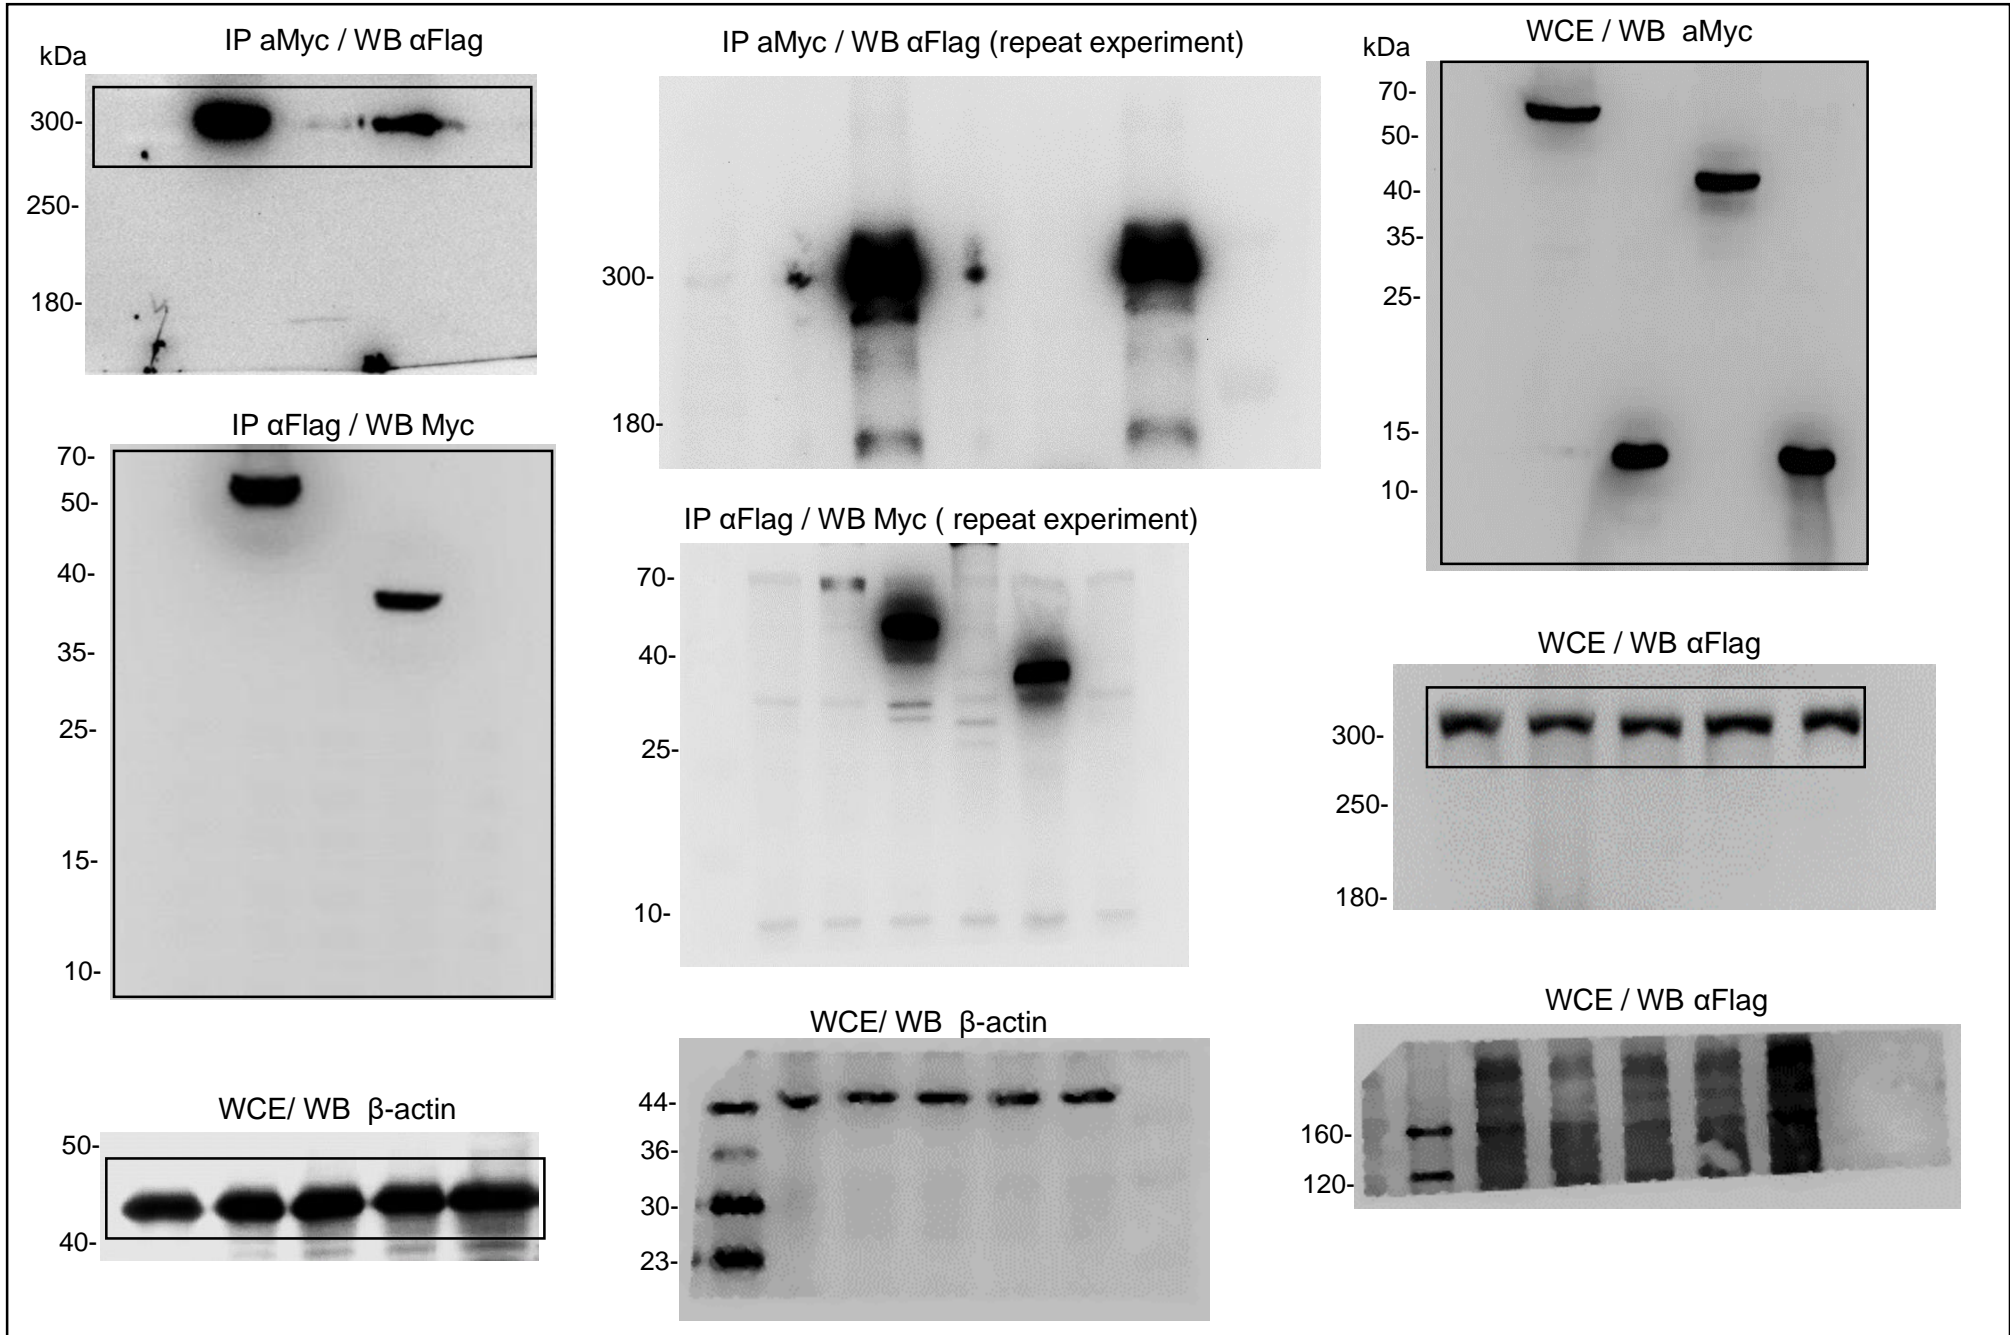

Supplement: NIHMS1624429-supplement-Source_Data_Fig__4_.pdf [file NIHMS1624429-supplement-Source_Data_Fig__4_.pdf]

# Source Data extended data Fig. 4

## extended data Fig. 4 a and b

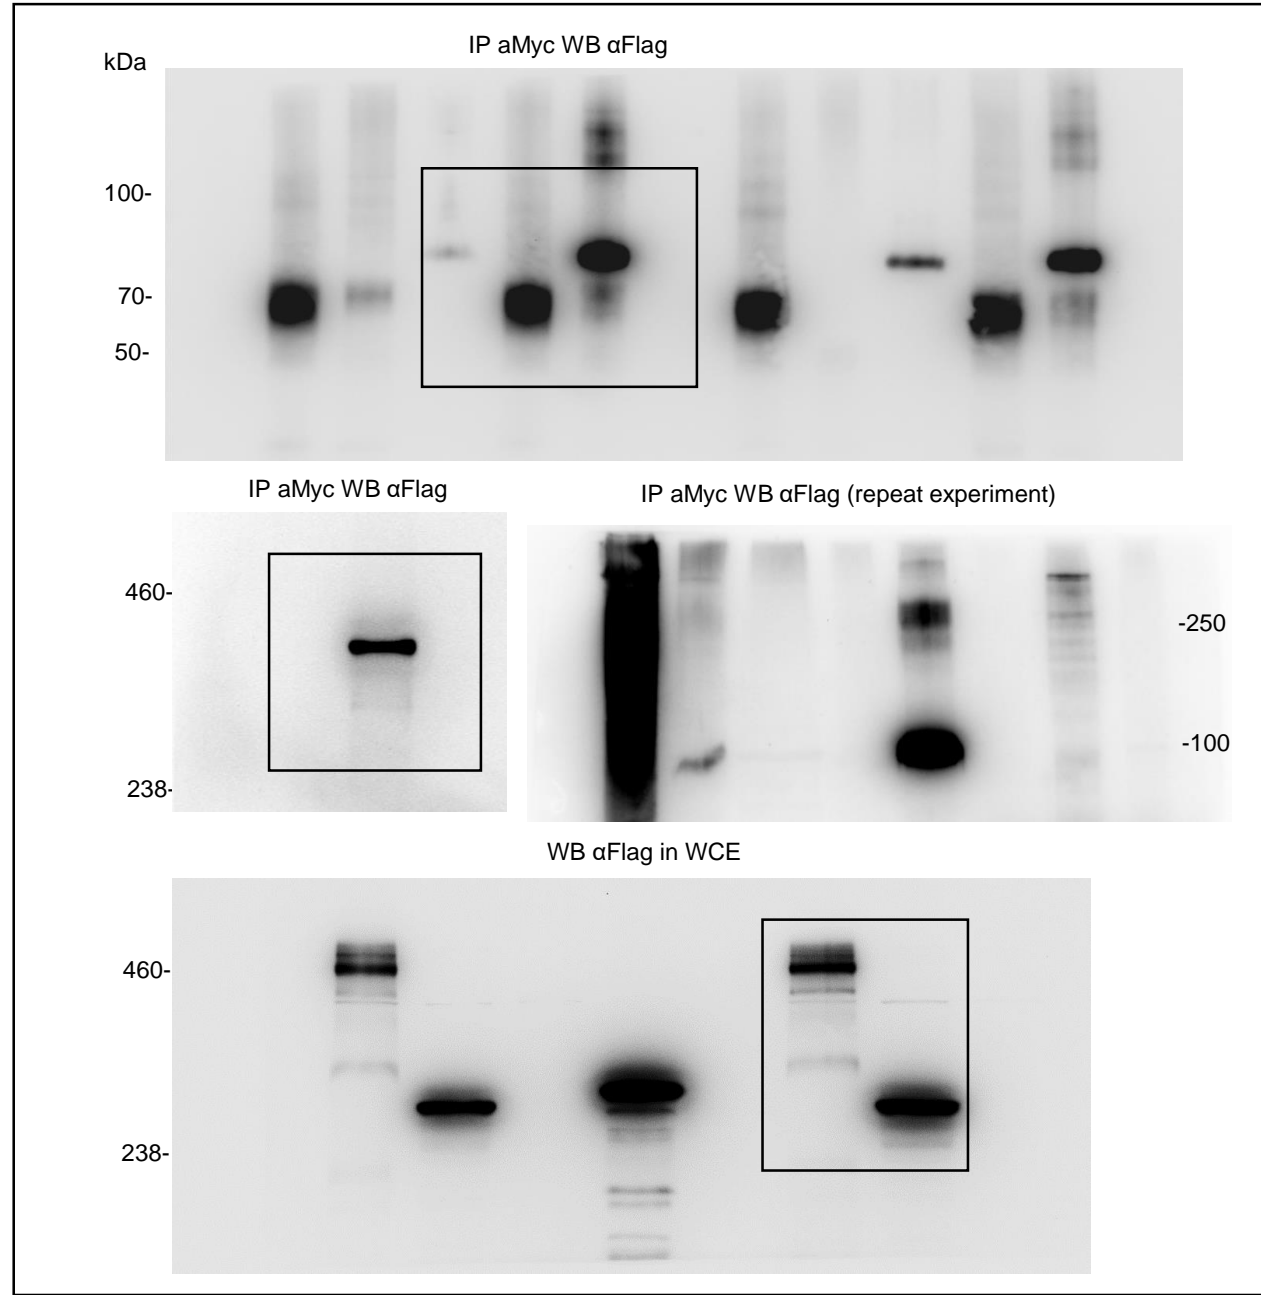

extended data Fig. 4 a and b

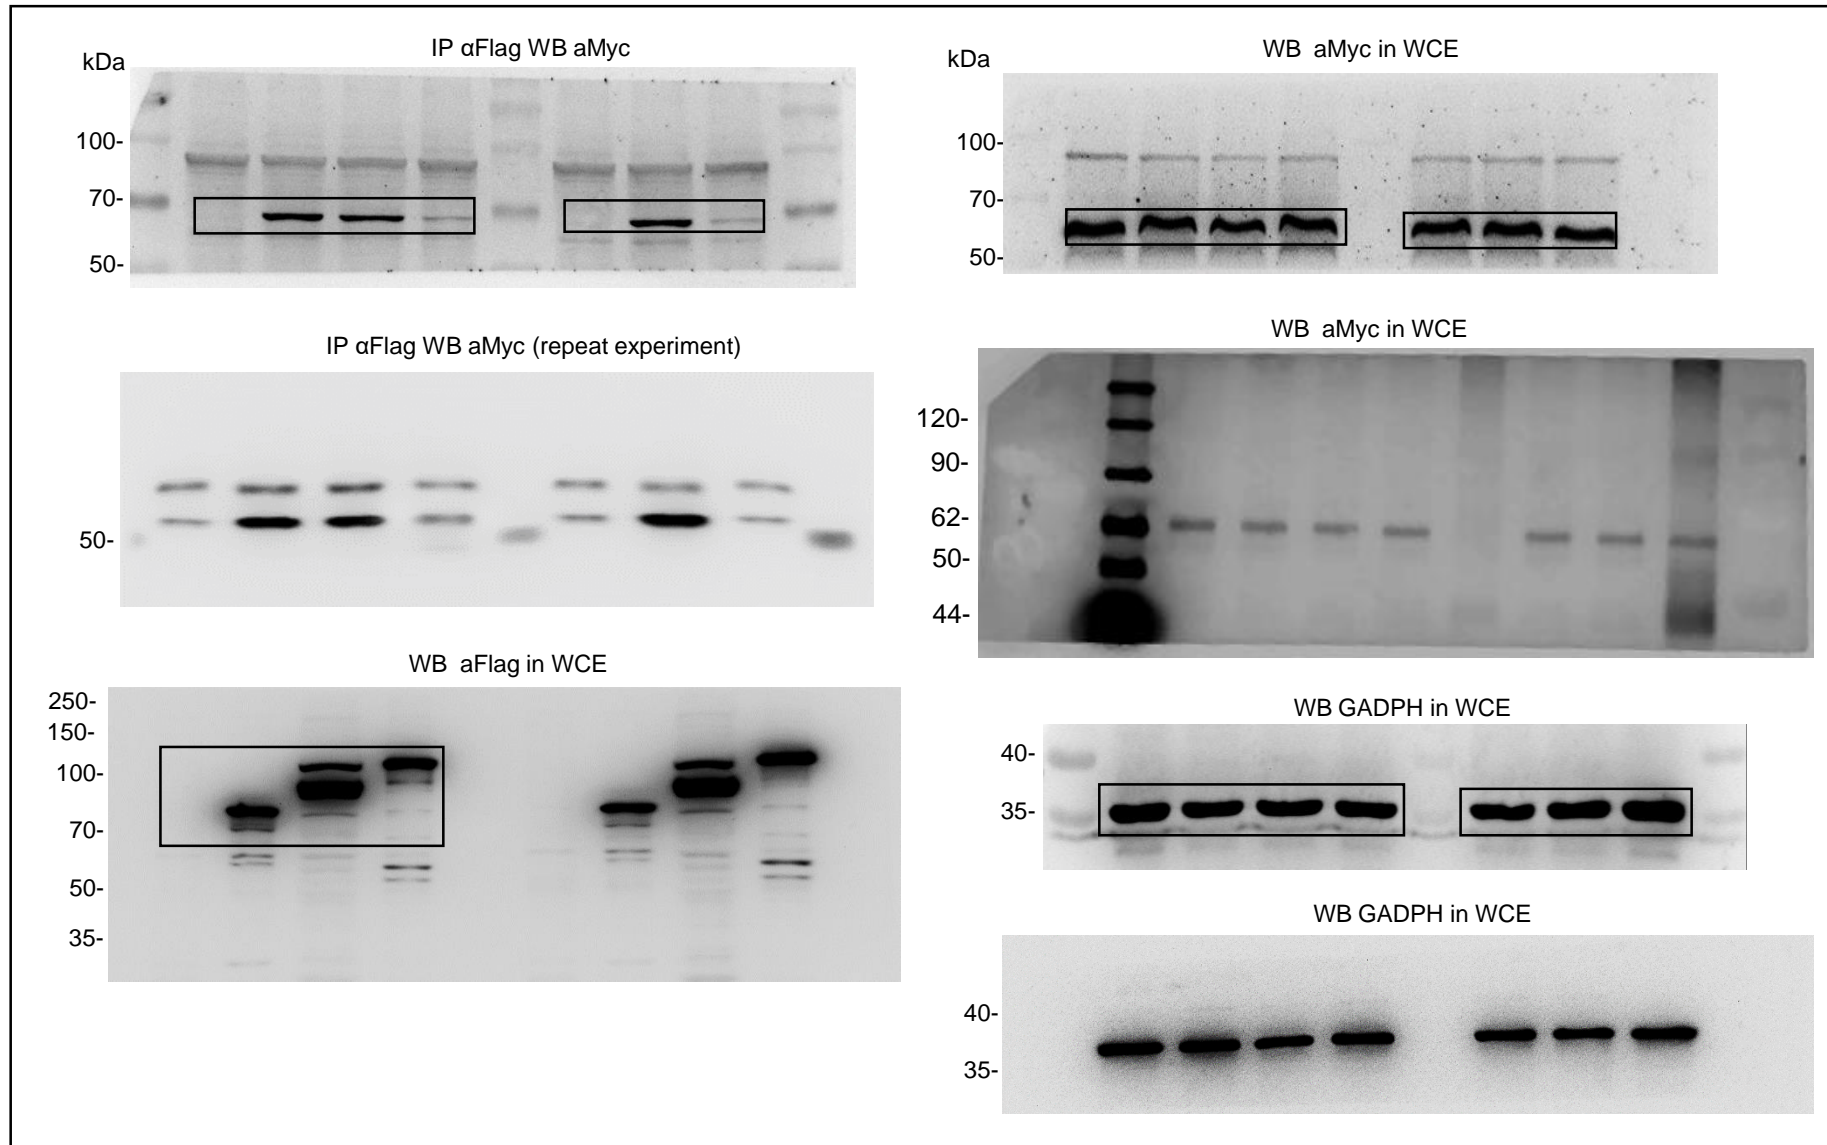

Supplement: NIHMS1624429-supplement-Source_Extended_Data_Fig4.pdf [file NIHMS1624429-supplement-Source_Extended_Data_Fig4.pdf]
